# Supplementary material for: Targeting p75NTR activity alleviates the neurotoxic effect of high glucose on iPSC-derived dopaminergic neurons
Source: Research Square preprint supplement (doi:10.21203/rs.3.rs-7184834/v1), 2025-09-23
Supplement: Supplementary file 1 [file 3556e700e2c84eac3c5b8113.xlsx]

## Sheet: Annotation
MyList	Gene ID	Type	Tax ID	Homologene Gene ID	Homologene Gene Tax ID	GO:1903047 mitotic cell cycle process	GO:0010564 regulation of cell cycle proce	R-HSA-191273 Cholesterol biosynthesis	WP2446 Retinoblastoma gene in cancer	M242 PID AURORA A PATHWAY	GO:0000132 establishment of mitotic spind	M14 PID AURORA B PATHWAY	WP5115 Network map of SARS CoV 2 sign	GO:0002064 epithelial cell development	WP3646 Hepatitis C and hepatocellular	WP3888 VEGFA VEGFR2 signaling	GO:0097435 supramolecular fiber organizat	GO:0071675 regulation of mononuclear cell	WP5036 Angiotensin II receptor type 1	WP5117 Cohesin complex Cornelia de La	R-HSA-202733 Cell surface interactions at t	WP4534 Mechanoregulation and patholog	hsa05166 Human T-cell leukemia virus 1	WP2005 miR targeted genes in muscle c	WP289 Myometrial relaxation and cont
PTTG1	9232	symbol	H. sapiens	9232	H. sapiens	1	0	0	0	0	0	0	0	0	0	0	0	0	0	1	0	0	1	0	0
ITGB5	3693	symbol	H. sapiens	3693	H. sapiens	0	0	0	0	0	0	0	0	0	0	1	1	0	1	0	0	1	0	0	0
TACC3	10460	symbol	H. sapiens	10460	H. sapiens	1	1	0	0	1	0	0	0	0	0	0	0	0	0	0	0	0	0	0	0
FDPS	2224	symbol	H. sapiens	2224	H. sapiens	0	0	1	1	0	0	0	0	0	0	0	0	0	0	0	0	0	1	0	0
SNRPA	6626	symbol	H. sapiens	6626	H. sapiens	0	0	0	0	0	0	0	0	0	0	0	0	0	0	0	0	0	0	0	0
CNN2	1265	symbol	H. sapiens	1265	H. sapiens	0	0	0	0	0	0	1	0	0	0	0	1	1	1	0	0	0	0	0	1
COL27A1	85301	symbol	H. sapiens	85301	H. sapiens	0	0	0	0	0	0	0	0	1	0	1	1	0	1	0	0	0	0	0	0
CYP51A1	1595	symbol	H. sapiens	1595	H. sapiens	0	0	1	0	0	0	0	0	0	0	0	0	0	0	0	0	0	0	1	1
GPC4	2239	symbol	H. sapiens	2239	H. sapiens	0	0	0	0	0	1	0	0	0	0	0	0	0	0	0	0	0	0	0	0
MEST	4232	symbol	H. sapiens	4232	H. sapiens	0	0	0	0	0	0	0	0	0	0	0	0	0	0	0	0	0	0	0	0
TPX2	22974	symbol	H. sapiens	22974	H. sapiens	1	1	0	0	1	0	1	0	0	0	0	1	0	0	0	0	0	0	0	0
FDFT1	2222	symbol	H. sapiens	2222	H. sapiens	0	0	1	0	0	0	0	0	0	0	0	0	0	0	0	0	0	0	0	0
MVK	4598	symbol	H. sapiens	4598	H. sapiens	0	0	1	1	0	0	0	0	0	0	0	0	1	0	0	0	0	0	0	0
TTYH2	94015	symbol	H. sapiens	94015	H. sapiens	0	0	0	0	0	0	0	0	0	0	0	0	0	0	0	0	0	0	0	0
SCARA3	51435	symbol	H. sapiens	51435	H. sapiens	0	0	0	0	0	0	0	0	0	0	0	0	0	0	0	0	0	0	0	0
FRZB	2487	symbol	H. sapiens	2487	H. sapiens	0	0	0	0	0	0	0	0	1	1	0	0	0	1	0	0	1	0	0	0
NPTX2	4885	symbol	H. sapiens	4885	H. sapiens	0	0	0	0	0	0	0	0	0	0	0	0	0	0	0	0	0	0	0	0
UBE2C	11065	symbol	H. sapiens	11065	H. sapiens	1	1	0	0	1	0	0	0	0	0	0	0	0	0	1	0	0	1	0	0
PLK1	5347	symbol	H. sapiens	5347	H. sapiens	1	1	0	0	1	1	1	0	0	0	0	0	0	0	1	0	0	0	1	0
CALR	811	symbol	H. sapiens	811	H. sapiens	1	1	0	0	0	0	0	0	0	0	1	1	1	1	0	0	0	1	0	0
SAPCD2	89958	symbol	H. sapiens	89958	H. sapiens	1	0	0	0	0	1	0	0	0	0	0	0	0	0	0	0	0	0	0	0
ARHGAP31	57514	symbol	H. sapiens	57514	H. sapiens	0	0	0	0	0	1	0	0	0	0	0	0	0	0	0	0	0	0	0	0
CTGF	1490	gene_synonym	H. sapiens	1490	H. sapiens	0	0	0	0	0	0	0	0	0	0	1	1	0	1	1	0	1	0	0	0
GJA1	2697	symbol	H. sapiens	2697	H. sapiens	1	0	0	0	0	1	0	1	1	0	1	1	1	1	0	0	0	1	1	1
INSM1	3642	symbol	H. sapiens	3642	H. sapiens	0	1	1	0	0	0	0	0	1	0	0	0	0	1	0	0	0	0	0	0
CSRP2	1466	symbol	H. sapiens	1466	H. sapiens	0	0	0	0	1	0	0	0	0	0	1	1	0	0	0	0	0	0	0	0
BIRC5	332	symbol	H. sapiens	332	H. sapiens	1	1	0	0	1	0	1	1	0	1	1	0	0	0	0	0	1	0	0	0
TEAD2	8463	symbol	H. sapiens	8463	H. sapiens	0	0	0	0	0	0	0	1	0	0	1	0	0	0	0	0	1	0	0	0
FLJ16779	100192386	symbol	H. sapiens	100192386	H. sapiens	0	0	0	0	0	0	0	0	0	0	0	0	0	0	0	0	0	0	0	0
E2F2	1870	symbol	H. sapiens	1870	H. sapiens	1	0	0	1	0	0	0	0	0	1	0	0	0	0	0	0	0	1	0	0
TAGLN	6876	symbol	H. sapiens	6876	H. sapiens	0	0	0	0	0	0	0	0	1	0	0	0	0	1	0	0	0	0	0	0
TYMS	7298	symbol	H. sapiens	7298	H. sapiens	1	0	0	1	0	0	0	0	1	0	0	0	0	1	1	0	0	0	1	0
EFS	10278	symbol	H. sapiens	10278	H. sapiens	0	0	0	0	0	0	0	0	0	0	0	0	0	0	0	0	0	0	0	0
EPPK1	83481	symbol	H. sapiens	83481	H. sapiens	0	0	0	0	0	0	0	0	0	0	0	1	1	0	0	0	0	0	0	0
CDCA5	113130	symbol	H. sapiens	113130	H. sapiens	1	1	0	0	0	0	0	0	0	0	0	0	0	0	1	0	0	0	0	0
TPM2	7169	symbol	H. sapiens	7169	H. sapiens	0	0	0	0	0	0	0	0	0	0	0	1	0	0	0	0	0	0	1	1
ACAT2	39	symbol	H. sapiens	39	H. sapiens	0	0	1	0	0	0	0	0	0	0	0	0	0	0	0	0	0	0	0	0
KIF2C	11004	symbol	H. sapiens	11004	H. sapiens	1	1	0	0	0	1	1	0	0	0	0	1	0	0	0	1	0	0	0	0
TP53I3	9540	symbol	H. sapiens	9540	H. sapiens	1	0	0	1	0	0	0	1	0	0	0	0	0	0	0	0	0	0	0	0
RRM2	6241	symbol	H. sapiens	6241	H. sapiens	1	1	0	1	0	0	0	1	0	1	0	0	0	0	0	0	0	0	0	0
KLHL1	57626	symbol	H. sapiens	57626	H. sapiens	0	0	0	0	0	0	0	0	0	0	0	1	0	0	0	0	0	0	0	0
CCNB2	9133	symbol	H. sapiens	9133	H. sapiens	1	0	0	1	1	0	0	1	1	0	0	0	0	0	0	0	0	1	0	0
MYRF	745	symbol	H. sapiens	745	H. sapiens	0	0	0	0	0	0	0	0	0	0	0	0	0	0	0	0	0	0	0	0
DEPDC1B	55789	symbol	H. sapiens	55789	H. sapiens	0	0	0	0	0	1	0	0	0	0	0	0	0	0	0	0	0	0	0	0
LGI2	55203	symbol	H. sapiens	55203	H. sapiens	0	0	0	0	0	0	0	0	0	0	1	0	0	0	0	0	0	0	0	0
SPSB4	92369	symbol	H. sapiens	92369	H. sapiens	0	0	0	0	0	0	0	0	0	0	0	0	0	0	0	0	0	0	0	0
CCNB1	891	symbol	H. sapiens	891	H. sapiens	1	1	0	1	0	0	0	1	0	0	0	0	0	1	0	0	0	0	0	0
IFIT1	3434	symbol	H. sapiens	3434	H. sapiens	0	0	0	0	0	0	0	1	0	0	0	0	1	0	0	0	0	0	0	0
TNS3	64759	symbol	H. sapiens	64759	H. sapiens	0	0	0	0	0	0	0	0	0	0	0	0	0	1	0	0	0	0	0	0
ACTA2	59	symbol	H. sapiens	59	H. sapiens	0	0	0	0	0	0	1	0	1	0	1	0	1	1	0	0	1	0	0	1
TRIM5	85363	symbol	H. sapiens	85363	H. sapiens	1	0	0	0	0	0	0	0	0	0	0	0	0	0	0	0	0	0	0	0
ACSBG1	23205	symbol	H. sapiens	23205	H. sapiens	0	0	1	1	0	0	0	0	0	0	0	0	0	0	0	0	0	0	0	0
CD58	965	symbol	H. sapiens	965	H. sapiens	0	0	0	0	0	0	0	0	0	0	0	0	0	1	0	1	0	1	0	0
CNN1	1264	symbol	H. sapiens	1264	H. sapiens	0	0	0	0	0	0	0	0	0	0	0	1	0	0	0	0	0	0	0	1
BVES	11149	gene_synonym	H. sapiens	11149	H. sapiens	1	0	0	0	0	0	0	0	0	0	0	0	0	1	0	0	1	0	0	0
KIF20A	10112	symbol	H. sapiens	10112	H. sapiens	1	1	0	0	0	0	1	0	0	0	0	0	0	0	0	1	0	0	0	0
FOXJ1	2302	symbol	H. sapiens	2302	H. sapiens	1	0	0	0	0	1	1	0	1	0	0	1	1	0	0	0	0	0	0	0
S1PR3	1903	symbol	H. sapiens	1903	H. sapiens	0	0	0	0	0	0	0	0	0	0	0	0	0	0	0	0	0	0	0	0
CFAP126	257177	symbol	H. sapiens	257177	H. sapiens	0	0	0	0	0	0	0	0	0	0	0	0	0	0	0	0	0	0	0	0
CENPA	1058	symbol	H. sapiens	1058	H. sapiens	1	0	0	0	1	1	1	0	0	0	0	0	0	0	0	0	0	0	0	0
FAM64A	54478	gene_synonym	H. sapiens	54478	H. sapiens	1	0	0	0	0	0	0	0	0	0	0	0	0	0	0	0	0	0	0	0
IGFBP7	3490	symbol	H. sapiens	3490	H. sapiens	0	0	0	0	0	0	0	0	0	0	1	0	0	0	0	0	0	1	0	0
PIF1	80119	symbol	H. sapiens	80119	H. sapiens	1	0	0	0	0	0	1	0	0	0	0	0	0	0	1	0	0	0	0	0
FOXN4	121643	symbol	H. sapiens	121643	H. sapiens	0	0	0	0	0	0	0	0	0	0	1	0	0	0	0	0	0	0	0	0
CD9	928	symbol	H. sapiens	928	H. sapiens	0	0	0	0	0	0	0	0	1	0	0	1	1	0	0	1	0	0	0	0
CCL2	6347	symbol	H. sapiens	6347	H. sapiens	0	1	0	0	0	0	1	1	0	0	1	0	1	1	0	0	0	1	0	0
COL1A1	1277	symbol	H. sapiens	1277	H. sapiens	0	0	0	0	0	0	0	1	0	0	1	1	0	1	0	1	0	0	1	0
B9D1	27077	symbol	H. sapiens	27077	H. sapiens	0	0	0	0	0	0	0	1	1	0	1	0	0	0	0	0	0	0	0	0
CDC45	8318	symbol	H. sapiens	8318	H. sapiens	1	1	0	1	0	0	1	0	0	0	0	0	0	0	1	0	0	0	0	0
HSPA2	3306	symbol	H. sapiens	3306	H. sapiens	1	1	0	0	0	0	1	0	0	0	0	0	1	1	0	0	0	1	0	0
NEUROG1	4762	symbol	H. sapiens	4762	H. sapiens	1	1	0	0	0	0	0	0	0	0	0	0	0	1	0	0	0	0	0	1
LSM14A	26065	symbol	H. sapiens	26065	H. sapiens	1	0	0	0	1	0	0	0	0	0	0	0	0	0	0	0	0	0	0	0
SLC7A8	23428	symbol	H. sapiens	23428	H. sapiens	0	0	0	0	0	0	0	0	0	0	0	0	0	1	0	1	0	0	0	0
MIF	4282	symbol	H. sapiens	4282	H. sapiens	0	0	1	0	0	0	0	0	0	0	0	0	1	0	0	1	0	0	0	0
NEUROG2	63973	symbol	H. sapiens	63973	H. sapiens	0	0	0	0	0	0	0	0	0	0	0	0	0	0	0	0	0	0	0	0
BEST3	144453	symbol	H. sapiens	144453	H. sapiens	0	0	0	0	0	0	0	0	0	0	0	0	0	0	0	0	0	0	0	1
PPP1R17	10842	symbol	H. sapiens	10842	H. sapiens	0	0	0	0	0	0	0	0	0	0	0	0	0	0	0	0	0	0	0	0
PHF1	5252	symbol	H. sapiens	5252	H. sapiens	0	0	0	0	0	0	0	0	0	0	0	0	0	0	0	0	0	0	0	0
EEF1D	1936	symbol	H. sapiens	1936	H. sapiens	0	0	0	0	0	0	0	0	0	0	0	0	0	0	0	0	0	0	0	0
RPS17	6218	symbol	H. sapiens	6218	H. sapiens	0	0	0	0	0	0	0	0	0	0	0	0	0	0	0	0	0	1	0	0
LINC00261	140828	symbol	H. sapiens	140828	H. sapiens	0	0	0	0	0	0	0	0	0	0	0	0	0	0	0	0	0	0	0	0

## Sheet: Enrichment
GroupID	Category	Term	Description	LogP	Log(q-value)	Genes	Symbols	InTerm_InList
1_Summary	GO Biological Processes	GO:1903047	mitotic cell cycle process	-12.2242	-7.88198	332,891,1058,2697,4762,5347,8318,9133,10112,10460,11004,11065,22974,26065,89958,113130,1870,3306,6241,7298,9232,80119,54478,2302,11149,811,9540,85363	BIRC5,CCNB1,CENPA,GJA1,NEUROG1,PLK1,CDC45,CCNB2,KIF20A,TACC3,KIF2C,UBE2C,TPX2,LSM14A,SAPCD2,CDCA5,E2F2,HSPA2,RRM2,TYMS,PTTG1,PIF1,PIMREG,FOXJ1,POPDC1,CALR,TP53I3,TRIM5	28/-
1_Member	GO Biological Processes	GO:1903047	mitotic cell cycle process	-12.2242	-7.88198	332,891,1058,2697,4762,5347,8318,9133,10112,10460,11004,11065,22974,26065,89958,113130	BIRC5,CCNB1,CENPA,GJA1,NEUROG1,PLK1,CDC45,CCNB2,KIF20A,TACC3,KIF2C,UBE2C,TPX2,LSM14A,SAPCD2,CDCA5	16/523
1_Member	GO Biological Processes	GO:0000278	mitotic cell cycle	-11.2929	-7.2517	332,891,1058,2697,4762,5347,8318,9133,10112,10460,11004,11065,22974,26065,89958,113130	BIRC5,CCNB1,CENPA,GJA1,NEUROG1,PLK1,CDC45,CCNB2,KIF20A,TACC3,KIF2C,UBE2C,TPX2,LSM14A,SAPCD2,CDCA5	16/603
1_Member	Reactome Gene Sets	R-HSA-1640170	Cell Cycle	-10.3973	-6.53219	891,1870,3306,5347,6241,7298,8318,9133,9232,10112,11004,11065,22974,80119,113130	CCNB1,E2F2,HSPA2,PLK1,RRM2,TYMS,CDC45,CCNB2,PTTG1,KIF20A,KIF2C,UBE2C,TPX2,PIF1,CDCA5	15/584
1_Member	GO Biological Processes	GO:0000280	nuclear division	-10.2354	-6.49521	332,891,3306,4762,5347,9133,9232,11004,11065,22974,26065,113130	BIRC5,CCNB1,HSPA2,NEUROG1,PLK1,CCNB2,PTTG1,KIF2C,UBE2C,TPX2,LSM14A,CDCA5	12/320
1_Member	GO Biological Processes	GO:1902850	microtubule cytoskeleton organization involved in mitosis	-9.97657	-6.39842	332,891,1058,2697,5347,10460,22974,26065,89958	BIRC5,CCNB1,CENPA,GJA1,PLK1,TACC3,TPX2,LSM14A,SAPCD2	9/135
1_Member	GO Biological Processes	GO:0051301	cell division	-9.96253	-6.39842	332,891,1058,5347,9133,9232,10112,10460,11004,11065,22974,54478,89958,113130	BIRC5,CCNB1,CENPA,PLK1,CCNB2,PTTG1,KIF20A,TACC3,KIF2C,UBE2C,TPX2,PIMREG,SAPCD2,CDCA5	14/522
1_Member	GO Biological Processes	GO:0048285	organelle fission	-9.81664	-6.31947	332,891,3306,4762,5347,9133,9232,11004,11065,22974,26065,113130	BIRC5,CCNB1,HSPA2,NEUROG1,PLK1,CCNB2,PTTG1,KIF2C,UBE2C,TPX2,LSM14A,CDCA5	12/348
1_Member	Reactome Gene Sets	R-HSA-69278	Cell Cycle, Mitotic	-9.37598	-5.98796	891,1870,5347,6241,7298,8318,9133,9232,10112,11004,11065,22974,113130	CCNB1,E2F2,PLK1,RRM2,TYMS,CDC45,CCNB2,PTTG1,KIF20A,KIF2C,UBE2C,TPX2,CDCA5	13/475
1_Member	GO Biological Processes	GO:0140014	mitotic nuclear division	-9.12889	-5.82802	332,891,4762,5347,11004,11065,22974,26065,113130	BIRC5,CCNB1,NEUROG1,PLK1,KIF2C,UBE2C,TPX2,LSM14A,CDCA5	9/168
1_Member	GO Biological Processes	GO:0000226	microtubule cytoskeleton organization	-8.34935	-5.08627	332,891,1058,2302,2697,5347,9133,10112,10460,11004,22974,26065,89958	BIRC5,CCNB1,CENPA,FOXJ1,GJA1,PLK1,CCNB2,KIF20A,TACC3,KIF2C,TPX2,LSM14A,SAPCD2	13/578
1_Member	GO Biological Processes	GO:0051276	chromosome organization	-7.93795	-4.74181	332,891,1058,3306,5347,8318,9232,11004,22974,26065,80119,113130	BIRC5,CCNB1,CENPA,HSPA2,PLK1,CDC45,PTTG1,KIF2C,TPX2,LSM14A,PIF1,CDCA5	12/511
1_Member	GO Biological Processes	GO:0098813	nuclear chromosome segregation	-7.8682	-4.72029	332,891,5347,9133,9232,11004,22974,26065,113130	BIRC5,CCNB1,PLK1,CCNB2,PTTG1,KIF2C,TPX2,LSM14A,CDCA5	9/234
1_Member	Canonical Pathways	M176	PID FOXM1 PATHWAY	-7.13171	-4.11167	332,891,1058,5347,9133	BIRC5,CCNB1,CENPA,PLK1,CCNB2	5/40
1_Member	GO Biological Processes	GO:0000070	mitotic sister chromatid segregation	-6.95164	-3.98959	332,891,5347,11004,22974,26065,113130	BIRC5,CCNB1,PLK1,KIF2C,TPX2,LSM14A,CDCA5	7/142
1_Member	GO Biological Processes	GO:0000819	sister chromatid segregation	-6.86909	-3.9418	332,891,5347,11004,22974,26065,113130	BIRC5,CCNB1,PLK1,KIF2C,TPX2,LSM14A,CDCA5	7/146
1_Member	GO Biological Processes	GO:0044772	mitotic cell cycle phase transition	-6.86909	-3.9418	332,891,4762,5347,9133,10460,11065	BIRC5,CCNB1,NEUROG1,PLK1,CCNB2,TACC3,UBE2C	7/146
1_Member	KEGG Pathway	hsa04110	Cell cycle	-6.63523	-3.78433	891,1870,5347,8318,9133,9232,113130	CCNB1,E2F2,PLK1,CDC45,CCNB2,PTTG1,CDCA5	7/158
1_Member	GO Biological Processes	GO:0044770	cell cycle phase transition	-6.6166	-3.77949	332,891,4762,5347,9133,10460,11065	BIRC5,CCNB1,NEUROG1,PLK1,CCNB2,TACC3,UBE2C	7/159
1_Member	GO Biological Processes	GO:0007052	mitotic spindle organization	-6.55482	-3.73107	332,891,5347,10460,22974,26065	BIRC5,CCNB1,PLK1,TACC3,TPX2,LSM14A	6/99
1_Member	GO Biological Processes	GO:0007059	chromosome segregation	-6.53934	-3.72855	332,891,5347,9133,9232,11004,22974,26065,113130	BIRC5,CCNB1,PLK1,CCNB2,PTTG1,KIF2C,TPX2,LSM14A,CDCA5	9/335
1_Member	GO Biological Processes	GO:0007051	spindle organization	-6.43698	-3.64992	332,891,5347,9133,10460,22974,26065	BIRC5,CCNB1,PLK1,CCNB2,TACC3,TPX2,LSM14A	7/169
1_Member	Reactome Gene Sets	R-HSA-2980767	Activation of NIMA Kinases NEK9, NEK6, NEK7	-6.43588	-3.64992	891,5347,9133	CCNB1,PLK1,CCNB2	3/6
1_Member	Reactome Gene Sets	R-HSA-68882	Mitotic Anaphase	-6.15633	-3.41612	891,5347,9133,9232,11004,11065,113130	CCNB1,PLK1,CCNB2,PTTG1,KIF2C,UBE2C,CDCA5	7/186
1_Member	Reactome Gene Sets	R-HSA-2555396	Mitotic Metaphase and Anaphase	-6.14069	-3.41121	891,5347,9133,9232,11004,11065,113130	CCNB1,PLK1,CCNB2,PTTG1,KIF2C,UBE2C,CDCA5	7/187
1_Member	WikiPathways	WP179	Cell cycle	-6.06098	-3.34196	891,1870,5347,8318,9133,9232	CCNB1,E2F2,PLK1,CDC45,CCNB2,PTTG1	6/120
1_Member	GO Biological Processes	GO:0051983	regulation of chromosome segregation	-5.72446	-3.03541	332,891,5347,10460,11004,11065	BIRC5,CCNB1,PLK1,TACC3,KIF2C,UBE2C	6/137
1_Member	GO Biological Processes	GO:0051656	establishment of organelle localization	-5.68316	-3.00366	332,891,1058,2697,5347,10460,11004,89958,113130	BIRC5,CCNB1,CENPA,GJA1,PLK1,TACC3,KIF2C,SAPCD2,CDCA5	9/425
1_Member	GO Biological Processes	GO:0051640	organelle localization	-5.66484	-2.99468	332,891,1058,2697,5347,10460,11004,11149,89958,113130	BIRC5,CCNB1,CENPA,GJA1,PLK1,TACC3,KIF2C,POPDC1,SAPCD2,CDCA5	10/551
1_Member	Reactome Gene Sets	R-HSA-68886	M Phase	-5.30698	-2.70508	891,5347,9133,9232,10112,11004,11065,113130	CCNB1,PLK1,CCNB2,PTTG1,KIF20A,KIF2C,UBE2C,CDCA5	8/354
1_Member	Reactome Gene Sets	R-HSA-156711	Polo-like kinase mediated events	-5.18253	-2.61111	891,5347,9133	CCNB1,PLK1,CCNB2	3/14
1_Member	Reactome Gene Sets	R-HSA-162658	Golgi Cisternae Pericentriolar Stack Reorganization	-5.18253	-2.61111	891,5347,9133	CCNB1,PLK1,CCNB2	3/14
1_Member	Canonical Pathways	M129	PID PLK1 PATHWAY	-5.14789	-2.59096	891,5347,10112,22974	CCNB1,PLK1,KIF20A,TPX2	4/46
1_Member	Reactome Gene Sets	R-HSA-2500257	Resolution of Sister Chromatid Cohesion	-4.98417	-2.44808	891,5347,9133,11004,113130	CCNB1,PLK1,CCNB2,KIF2C,CDCA5	5/107
1_Member	GO Biological Processes	GO:0033045	regulation of sister chromatid segregation	-4.96449	-2.43514	332,891,5347,10460,11065	BIRC5,CCNB1,PLK1,TACC3,UBE2C	5/108
1_Member	Reactome Gene Sets	R-HSA-176412	Phosphorylation of the APC/C	-4.91364	-2.39091	891,5347,11065	CCNB1,PLK1,UBE2C	3/17
1_Member	GO Biological Processes	GO:0044839	cell cycle G2/M phase transition	-4.83568	-2.33227	332,891,5347,9133	BIRC5,CCNB1,PLK1,CCNB2	4/55
1_Member	Reactome Gene Sets	R-HSA-176814	Activation of APC/C and APC/C:Cdc20 mediated degradation of mitotic proteins	-4.83568	-2.33227	891,5347,9232,11065	CCNB1,PLK1,PTTG1,UBE2C	4/55
1_Member	GO Biological Processes	GO:0010965	regulation of mitotic sister chromatid separation	-4.62817	-2.16672	332,891,5347,11065	BIRC5,CCNB1,PLK1,UBE2C	4/62
1_Member	Reactome Gene Sets	R-HSA-174143	APC/C-mediated degradation of cell cycle proteins	-4.60056	-2.15039	891,5347,9232,11065	CCNB1,PLK1,PTTG1,UBE2C	4/63
1_Member	Reactome Gene Sets	R-HSA-453276	Regulation of mitotic cell cycle	-4.60056	-2.15039	891,5347,9232,11065	CCNB1,PLK1,PTTG1,UBE2C	4/63
1_Member	Reactome Gene Sets	R-HSA-69273	Cyclin A/B1/B2 associated events during G2/M transition	-4.50296	-2.06918	891,5347,9133	CCNB1,PLK1,CCNB2	3/23
1_Member	Reactome Gene Sets	R-HSA-69620	Cell Cycle Checkpoints	-4.36781	-1.96005	891,5347,8318,9133,11004,11065	CCNB1,PLK1,CDC45,CCNB2,KIF2C,UBE2C	6/237
1_Member	GO Biological Processes	GO:0051783	regulation of nuclear division	-4.31941	-1.92162	332,811,891,5347,11065	BIRC5,CALR,CCNB1,PLK1,UBE2C	5/147
1_Member	GO Biological Processes	GO:0033044	regulation of chromosome organization	-4.27794	-1.89917	332,891,5347,10460,11065,80119	BIRC5,CCNB1,PLK1,TACC3,UBE2C,PIF1	6/246
1_Member	Reactome Gene Sets	R-HSA-2467813	Separation of Sister Chromatids	-4.27765	-1.89917	5347,9232,11004,11065,113130	PLK1,PTTG1,KIF2C,UBE2C,CDCA5	5/150
1_Member	GO Biological Processes	GO:1905818	regulation of chromosome separation	-4.25651	-1.88273	332,891,5347,11065	BIRC5,CCNB1,PLK1,UBE2C	4/77
1_Member	Reactome Gene Sets	R-HSA-68877	Mitotic Prometaphase	-3.98475	-1.63677	891,5347,9133,11004,113130	CCNB1,PLK1,CCNB2,KIF2C,CDCA5	5/173
1_Member	GO Biological Processes	GO:0030071	regulation of mitotic metaphase/anaphase transition	-3.93663	-1.60297	332,891,5347,11065	BIRC5,CCNB1,PLK1,UBE2C	4/93
1_Member	GO Biological Processes	GO:0051303	establishment of chromosome localization	-3.88322	-1.56626	332,891,11004,113130	BIRC5,CCNB1,KIF2C,CDCA5	4/96
1_Member	GO Biological Processes	GO:1902099	regulation of metaphase/anaphase transition of cell cycle	-3.88322	-1.56626	332,891,5347,11065	BIRC5,CCNB1,PLK1,UBE2C	4/96
1_Member	GO Biological Processes	GO:0050000	chromosome localization	-3.74907	-1.44423	332,891,11004,113130	BIRC5,CCNB1,KIF2C,CDCA5	4/104
1_Member	Reactome Gene Sets	R-HSA-2980766	Nuclear Envelope Breakdown	-3.56135	-1.29096	891,5347,9133	CCNB1,PLK1,CCNB2	3/47
1_Member	GO Biological Processes	GO:0007088	regulation of mitotic nuclear division	-3.49741	-1.24505	332,891,5347,11065	BIRC5,CCNB1,PLK1,UBE2C	4/121
1_Member	GO Biological Processes	GO:0000086	G2/M transition of mitotic cell cycle	-3.48152	-1.23267	332,891,5347	BIRC5,CCNB1,PLK1	3/50
1_Member	GO Biological Processes	GO:0007127	meiosis I	-3.44372	-1.21204	3306,5347,9133,9232	HSPA2,PLK1,CCNB2,PTTG1	4/125
1_Member	Reactome Gene Sets	R-HSA-174178	APC/C:Cdh1 mediated degradation of Cdc20 and other APC/C:Cdh1 targeted proteins in late mitosis/early G1	-3.43105	-1.20936	5347,9232,11065	PLK1,PTTG1,UBE2C	3/52
1_Member	GO Biological Processes	GO:0061982	meiosis I cell cycle process	-3.40465	-1.18949	3306,5347,9133,9232	HSPA2,PLK1,CCNB2,PTTG1	4/128
1_Member	Reactome Gene Sets	R-HSA-176409	APC/C:Cdc20 mediated degradation of mitotic proteins	-3.38259	-1.17387	891,9232,11065	CCNB1,PTTG1,UBE2C	3/54
1_Member	GO Biological Processes	GO:0007080	mitotic metaphase chromosome alignment	-3.33599	-1.14602	891,11004,113130	CCNB1,KIF2C,CDCA5	3/56
1_Member	Reactome Gene Sets	R-HSA-176408	Regulation of APC/C activators between G1/S and early anaphase	-3.31335	-1.12944	891,5347,11065	CCNB1,PLK1,UBE2C	3/57
1_Member	GO Biological Processes	GO:0033047	regulation of mitotic sister chromatid segregation	-3.29112	-1.1132	332,891,5347	BIRC5,CCNB1,PLK1	3/58
1_Member	Reactome Gene Sets	R-HSA-8852276	The role of GTSE1 in G2/M progression after G2 checkpoint	-3.29112	-1.1132	891,5347,9133	CCNB1,PLK1,CCNB2	3/58
1_Member	KEGG Pathway	hsa04114	Oocyte meiosis	-3.26945	-1.0945	891,5347,9133,9232	CCNB1,PLK1,CCNB2,PTTG1	4/139
1_Member	WikiPathways	WP45	G1 to S cell cycle control	-3.1657	-1.00813	891,1870,8318	CCNB1,E2F2,CDC45	3/64
1_Member	Reactome Gene Sets	R-HSA-69275	G2/M Transition	-3.0715	-0.929486	891,5347,9133,22974	CCNB1,PLK1,CCNB2,TPX2	4/157
1_Member	Reactome Gene Sets	R-HSA-453274	Mitotic G2-G2/M phases	-3.05105	-0.918303	891,5347,9133,22974	CCNB1,PLK1,CCNB2,TPX2	4/159
1_Member	Reactome Gene Sets	R-HSA-2565942	Regulation of PLK1 Activity at G2/M Transition	-2.99921	-0.876425	891,5347,9133	CCNB1,PLK1,CCNB2	3/73
1_Member	GO Biological Processes	GO:0140013	meiotic nuclear division	-2.91537	-0.803555	3306,5347,9133,9232	HSPA2,PLK1,CCNB2,PTTG1	4/173
1_Member	Canonical Pathways	M19	PID P73PATHWAY	-2.89991	-0.793174	891,5347,9540	CCNB1,PLK1,TP53I3	3/79
1_Member	GO Biological Processes	GO:0051310	metaphase chromosome alignment	-2.83808	-0.743814	891,11004,113130	CCNB1,KIF2C,CDCA5	3/83
1_Member	GO Biological Processes	GO:1903046	meiotic cell cycle process	-2.73306	-0.648477	3306,5347,9133,9232	HSPA2,PLK1,CCNB2,PTTG1	4/194
1_Member	GO Biological Processes	GO:0045132	meiotic chromosome segregation	-2.70987	-0.636069	5347,9133,9232	PLK1,CCNB2,PTTG1	3/92
1_Member	KEGG Pathway	hsa05170	Human immunodeficiency virus 1 infection	-2.58614	-0.531672	811,891,9133,85363	CALR,CCNB1,CCNB2,TRIM5	4/213
1_Member	GO Biological Processes	GO:0010389	regulation of G2/M transition of mitotic cell cycle	-2.50084	-0.45743	891,3306,5347	CCNB1,HSPA2,PLK1	3/109
1_Member	KEGG Pathway	hsa04914	Progesterone-mediated oocyte maturation	-2.47859	-0.439526	891,5347,9133	CCNB1,PLK1,CCNB2	3/111
1_Member	GO Biological Processes	GO:1902749	regulation of cell cycle G2/M phase transition	-2.36354	-0.343491	891,3306,5347	CCNB1,HSPA2,PLK1	3/122
1_Member	GO Biological Processes	GO:0051321	meiotic cell cycle	-2.29615	-0.292345	3306,5347,9133,9232	HSPA2,PLK1,CCNB2,PTTG1	4/257
1_Member	Reactome Gene Sets	R-HSA-69481	G2/M Checkpoints	-2.26836	-0.274402	891,8318,9133	CCNB1,CDC45,CCNB2	3/132
1_Member	Reactome Gene Sets	R-HSA-68875	Mitotic Prophase	-2.25928	-0.271125	891,5347,9133	CCNB1,PLK1,CCNB2	3/133
1_Member	KEGG Pathway	hsa04068	FoxO signaling pathway	-2.25928	-0.271125	891,5347,9133	CCNB1,PLK1,CCNB2	3/133
1_Member	KEGG Pathway	hsa04218	Cellular senescence	-2.06147	-0.130826	891,1870,9133	CCNB1,E2F2,CCNB2	3/157
2_Summary	GO Biological Processes	GO:0010564	regulation of cell cycle process	-9.67511	-6.23594	332,811,891,3306,3642,4762,5347,6241,6347,8318,10112,10460,11004,11065,22974,113130	BIRC5,CALR,CCNB1,HSPA2,INSM1,NEUROG1,PLK1,RRM2,CCL2,CDC45,KIF20A,TACC3,KIF2C,UBE2C,TPX2,CDCA5	16/-
2_Member	GO Biological Processes	GO:0010564	regulation of cell cycle process	-9.67511	-6.23594	332,811,891,3306,3642,4762,5347,6241,6347,8318,10112,10460,11004,11065,22974,113130	BIRC5,CALR,CCNB1,HSPA2,INSM1,NEUROG1,PLK1,RRM2,CCL2,CDC45,KIF20A,TACC3,KIF2C,UBE2C,TPX2,CDCA5	16/776
2_Member	GO Biological Processes	GO:0031536	positive regulation of exit from mitosis	-9.14915	-5.82802	332,4762,11065,113130	BIRC5,NEUROG1,UBE2C,CDCA5	4/6
2_Member	GO Biological Processes	GO:1901992	positive regulation of mitotic cell cycle phase transition	-7.85844	-4.72029	332,891,3306,4762,6241,11065,113130	BIRC5,CCNB1,HSPA2,NEUROG1,RRM2,UBE2C,CDCA5	7/105
2_Member	GO Biological Processes	GO:1901989	positive regulation of cell cycle phase transition	-7.30863	-4.24512	332,891,3306,4762,6241,11065,113130	BIRC5,CCNB1,HSPA2,NEUROG1,RRM2,UBE2C,CDCA5	7/126
2_Member	GO Biological Processes	GO:0045931	positive regulation of mitotic cell cycle	-7.08024	-4.0804	332,891,3306,4762,6241,11065,113130	BIRC5,CCNB1,HSPA2,NEUROG1,RRM2,UBE2C,CDCA5	7/136
2_Member	GO Biological Processes	GO:0007096	regulation of exit from mitosis	-6.65232	-3.78718	332,4762,11065,113130	BIRC5,NEUROG1,UBE2C,CDCA5	4/20
2_Member	GO Biological Processes	GO:1901987	regulation of cell cycle phase transition	-6.20309	-3.4312	332,891,3306,4762,5347,6241,6347,8318,11065,113130	BIRC5,CCNB1,HSPA2,NEUROG1,PLK1,RRM2,CCL2,CDC45,UBE2C,CDCA5	10/480
2_Member	GO Biological Processes	GO:1901990	regulation of mitotic cell cycle phase transition	-6.16935	-3.41815	332,891,3306,4762,5347,6241,6347,11065,113130	BIRC5,CCNB1,HSPA2,NEUROG1,PLK1,RRM2,CCL2,UBE2C,CDCA5	9/371
2_Member	GO Biological Processes	GO:0045787	positive regulation of cell cycle	-5.40752	-2.78953	332,811,891,3306,4762,6241,11065,113130	BIRC5,CALR,CCNB1,HSPA2,NEUROG1,RRM2,UBE2C,CDCA5	8/343
2_Member	GO Biological Processes	GO:0090068	positive regulation of cell cycle process	-5.05461	-2.51169	332,891,3306,4762,6241,11065,113130	BIRC5,CCNB1,HSPA2,NEUROG1,RRM2,UBE2C,CDCA5	7/273
2_Member	GO Biological Processes	GO:0007346	regulation of mitotic cell cycle	-4.89136	-2.37517	332,891,3306,4762,5347,6241,6347,11065,113130	BIRC5,CCNB1,HSPA2,NEUROG1,PLK1,RRM2,CCL2,UBE2C,CDCA5	9/533
3_Summary	Reactome Gene Sets	R-HSA-191273	Cholesterol biosynthesis	-8.11913	-4.89081	39,1595,2222,2224,4598,3642,4282,23205	ACAT2,CYP51A1,FDFT1,FDPS,MVK,INSM1,MIF,ACSBG1	8/-
3_Member	Reactome Gene Sets	R-HSA-191273	Cholesterol biosynthesis	-8.11913	-4.89081	39,1595,2222,2224,4598	ACAT2,CYP51A1,FDFT1,FDPS,MVK	5/26
3_Member	WikiPathways	WP4190	Mevalonate arm of cholesterol biosynthesis pathway	-7.47712	-4.36531	39,2222,2224,4598	ACAT2,FDFT1,FDPS,MVK	4/13
3_Member	WikiPathways	WP5333	Enterocyte cholesterol metabolism	-7.36998	-4.28299	39,1595,2222,2224,4598	ACAT2,CYP51A1,FDFT1,FDPS,MVK	5/36
3_Member	WikiPathways	WP197	Cholesterol biosynthesis pathway	-7.19806	-4.15683	1595,2222,2224,4598	CYP51A1,FDFT1,FDPS,MVK	4/15
3_Member	WikiPathways	WP5329	Cholesterol biosynthesis pathway in hepatocytes	-6.96923	-3.98959	39,1595,2222,2224,4598	ACAT2,CYP51A1,FDFT1,FDPS,MVK	5/43
3_Member	WikiPathways	WP5193	Cholesterol synthesis disorders	-6.85013	-3.93922	1595,2222,2224,4598	CYP51A1,FDFT1,FDPS,MVK	4/18
3_Member	WikiPathways	WP4718	Cholesterol metabolism with Bloch and Kandutsch Russell pathways	-6.77049	-3.89063	39,1595,2222,2224,4598	ACAT2,CYP51A1,FDFT1,FDPS,MVK	5/47
3_Member	WikiPathways	WP3963	Mevalonate pathway	-6.19369	-3.4312	39,2224,4598	ACAT2,FDPS,MVK	3/7
3_Member	WikiPathways	WP5304	Cholesterol metabolism	-5.83313	-3.13432	39,1595,2222,2224,4598	ACAT2,CYP51A1,FDFT1,FDPS,MVK	5/72
3_Member	Reactome Gene Sets	R-HSA-2426168	Activation of gene expression by SREBF (SREBP)	-5.63186	-2.97084	1595,2222,2224,4598	CYP51A1,FDFT1,FDPS,MVK	4/35
3_Member	GO Biological Processes	GO:0006695	cholesterol biosynthetic process	-5.53279	-2.89809	1595,2222,2224,4598	CYP51A1,FDFT1,FDPS,MVK	4/37
3_Member	GO Biological Processes	GO:1902653	secondary alcohol biosynthetic process	-5.53279	-2.89809	1595,2222,2224,4598	CYP51A1,FDFT1,FDPS,MVK	4/37
3_Member	GO Biological Processes	GO:0016126	sterol biosynthetic process	-5.22606	-2.63967	1595,2222,2224,4598	CYP51A1,FDFT1,FDPS,MVK	4/44
3_Member	Reactome Gene Sets	R-HSA-1655829	Regulation of cholesterol biosynthesis by SREBP (SREBF)	-5.14789	-2.59096	1595,2222,2224,4598	CYP51A1,FDFT1,FDPS,MVK	4/46
3_Member	KEGG Pathway	hsa00900	Terpenoid backbone biosynthesis	-4.50296	-2.06918	39,2224,4598	ACAT2,FDPS,MVK	3/23
3_Member	Reactome Gene Sets	R-HSA-8957322	Metabolism of steroids	-4.40575	-1.98776	39,1595,2222,2224,4598	ACAT2,CYP51A1,FDFT1,FDPS,MVK	5/141
3_Member	GO Biological Processes	GO:1901617	organic hydroxy compound biosynthetic process	-3.96131	-1.62337	1595,2222,2224,3642,4598	CYP51A1,FDFT1,FDPS,INSM1,MVK	5/175
3_Member	GO Biological Processes	GO:0046165	alcohol biosynthetic process	-3.88322	-1.56626	1595,2222,2224,4598	CYP51A1,FDFT1,FDPS,MVK	4/96
3_Member	GO Biological Processes	GO:0006694	steroid biosynthetic process	-3.56727	-1.29096	1595,2222,2224,4598	CYP51A1,FDFT1,FDPS,MVK	4/116
3_Member	GO Biological Processes	GO:0008203	cholesterol metabolic process	-3.51113	-1.25522	1595,2222,2224,4598	CYP51A1,FDFT1,FDPS,MVK	4/120
3_Member	GO Biological Processes	GO:0016125	sterol metabolic process	-3.36657	-1.16732	1595,2222,2224,4598	CYP51A1,FDFT1,FDPS,MVK	4/131
3_Member	GO Biological Processes	GO:1902652	secondary alcohol metabolic process	-3.36657	-1.16732	1595,2222,2224,4598	CYP51A1,FDFT1,FDPS,MVK	4/131
3_Member	WikiPathways	WP1982	Sterol regulatory element binding proteins SREBP signaling	-3.07035	-0.929486	1595,2222,2224	CYP51A1,FDFT1,FDPS	3/69
3_Member	GO Biological Processes	GO:0044283	small molecule biosynthetic process	-2.80226	-0.715269	1595,2222,2224,4282,4598,23205	CYP51A1,FDFT1,FDPS,MIF,MVK,ACSBG1	6/466
3_Member	GO Biological Processes	GO:0006720	isoprenoid metabolic process	-2.38359	-0.355871	2222,2224,4598	FDFT1,FDPS,MVK	3/120
3_Member	GO Biological Processes	GO:0008202	steroid metabolic process	-2.29615	-0.292345	1595,2222,2224,4598	CYP51A1,FDFT1,FDPS,MVK	4/257
3_Member	GO Biological Processes	GO:0008610	lipid biosynthetic process	-2.25589	-0.269739	1595,2222,2224,4282,4598,23205	CYP51A1,FDFT1,FDPS,MIF,MVK,ACSBG1	6/602
3_Member	GO Biological Processes	GO:1901615	organic hydroxy compound metabolic process	-2.07284	-0.137112	1595,2222,2224,3642,4598	CYP51A1,FDFT1,FDPS,INSM1,MVK	5/468
3_Member	GO Biological Processes	GO:0006066	alcohol metabolic process	-1.99581	-0.0767905	1595,2222,2224,4598	CYP51A1,FDFT1,FDPS,MVK	4/314
3_Member	Reactome Gene Sets	R-HSA-556833	Metabolism of lipids	-1.97612	-0.0590645	39,1595,2222,2224,4598,23205	ACAT2,CYP51A1,FDFT1,FDPS,MVK,ACSBG1	6/691
4_Summary	WikiPathways	WP2446	Retinoblastoma gene in cancer	-6.83077	-3.93566	891,1870,6241,7298,8318,9133,2224,4598,23205,9540	CCNB1,E2F2,RRM2,TYMS,CDC45,CCNB2,FDPS,MVK,ACSBG1,TP53I3	10/-
4_Member	WikiPathways	WP2446	Retinoblastoma gene in cancer	-6.83077	-3.93566	891,1870,6241,7298,8318,9133	CCNB1,E2F2,RRM2,TYMS,CDC45,CCNB2	6/89
4_Member	Reactome Gene Sets	R-HSA-453279	Mitotic G1 phase and G1/S transition	-4.74244	-2.25751	891,1870,6241,7298,8318	CCNB1,E2F2,RRM2,TYMS,CDC45	5/120
4_Member	Reactome Gene Sets	R-HSA-69205	G1/S-Specific Transcription	-4.33872	-1.93597	6241,7298,8318	RRM2,TYMS,CDC45	3/26
4_Member	Reactome Gene Sets	R-HSA-69206	G1/S Transition	-3.70159	-1.40072	891,6241,7298,8318	CCNB1,RRM2,TYMS,CDC45	4/107
4_Member	Canonical Pathways	M40	PID E2F PATHWAY	-2.99921	-0.876425	1870,6241,7298	E2F2,RRM2,TYMS	3/73
4_Member	GO Biological Processes	GO:0090407	organophosphate biosynthetic process	-1.73677	0	2224,4598,6241,7298,23205	FDPS,MVK,RRM2,TYMS,ACSBG1	5/569
4_Member	GO Biological Processes	GO:0006753	nucleoside phosphate metabolic process	-1.71057	0	4598,6241,7298,9540,23205	MVK,RRM2,TYMS,TP53I3,ACSBG1	5/578
4_Member	GO Biological Processes	GO:0055086	nucleobase-containing small molecule metabolic process	-1.63504	0	4598,6241,7298,9540,23205	MVK,RRM2,TYMS,TP53I3,ACSBG1	5/605
4_Member	GO Biological Processes	GO:1901293	nucleoside phosphate biosynthetic process	-1.34882	0	6241,7298,23205	RRM2,TYMS,ACSBG1	3/295
5_Summary	Canonical Pathways	M242	PID AURORA A PATHWAY	-5.8495	-3.14071	332,1058,10460,22974,9133,26065,5347,1466,11065	BIRC5,CENPA,TACC3,TPX2,CCNB2,LSM14A,PLK1,CSRP2,UBE2C	9/-
5_Member	Canonical Pathways	M242	PID AURORA A PATHWAY	-5.8495	-3.14071	332,1058,10460,22974	BIRC5,CENPA,TACC3,TPX2	4/31
5_Member	GO Biological Processes	GO:0051225	spindle assembly	-3.74907	-1.44423	332,9133,22974,26065	BIRC5,CCNB2,TPX2,LSM14A	4/104
5_Member	GO Biological Processes	GO:0060236	regulation of mitotic spindle organization	-3.64674	-1.3498	5347,10460,22974	PLK1,TACC3,TPX2	3/44
5_Member	GO Biological Processes	GO:0090224	regulation of spindle organization	-3.53415	-1.27107	5347,10460,22974	PLK1,TACC3,TPX2	3/48
5_Member	GO Biological Processes	GO:0090307	mitotic spindle assembly	-3.45602	-1.22097	332,22974,26065	BIRC5,TPX2,LSM14A	3/51
5_Member	GO Biological Processes	GO:0140694	membraneless organelle assembly	-3.43352	-1.20936	332,1058,1466,9133,22974,26065	BIRC5,CENPA,CSRP2,CCNB2,TPX2,LSM14A	6/352
5_Member	GO Biological Processes	GO:0070507	regulation of microtubule cytoskeleton organization	-1.99582	-0.0767905	5347,10460,22974	PLK1,TACC3,TPX2	3/166
5_Member	GO Biological Processes	GO:0051347	positive regulation of transferase activity	-1.46877	0	5347,11065,22974	PLK1,UBE2C,TPX2	3/264
5_Member	GO Biological Processes	GO:0032886	regulation of microtubule-based process	-1.44831	0	5347,10460,22974	PLK1,TACC3,TPX2	3/269
6_Summary	GO Biological Processes	GO:0000132	establishment of mitotic spindle orientation	-5.53279	-2.89809	1058,2697,5347,89958,2302,11004,2239,55789,57514	CENPA,GJA1,PLK1,SAPCD2,FOXJ1,KIF2C,GPC4,DEPDC1B,ARHGAP31	9/-
6_Member	GO Biological Processes	GO:0000132	establishment of mitotic spindle orientation	-5.53279	-2.89809	1058,2697,5347,89958	CENPA,GJA1,PLK1,SAPCD2	4/37
6_Member	GO Biological Processes	GO:0040001	establishment of mitotic spindle localization	-5.30809	-2.70508	1058,2697,5347,89958	CENPA,GJA1,PLK1,SAPCD2	4/42
6_Member	GO Biological Processes	GO:0051294	establishment of spindle orientation	-5.11014	-2.56027	1058,2697,5347,89958	CENPA,GJA1,PLK1,SAPCD2	4/47
6_Member	GO Biological Processes	GO:0007163	establishment or maintenance of cell polarity	-4.72072	-2.24178	1058,2302,2697,5347,11004,89958	CENPA,FOXJ1,GJA1,PLK1,KIF2C,SAPCD2	6/205
6_Member	GO Biological Processes	GO:0051293	establishment of spindle localization	-4.65625	-2.18905	1058,2697,5347,89958	CENPA,GJA1,PLK1,SAPCD2	4/61
6_Member	GO Biological Processes	GO:0051653	spindle localization	-4.52044	-2.0758	1058,2697,5347,89958	CENPA,GJA1,PLK1,SAPCD2	4/66
6_Member	GO Biological Processes	GO:0030010	establishment of cell polarity	-4.42052	-1.99734	1058,2302,2697,5347,89958	CENPA,FOXJ1,GJA1,PLK1,SAPCD2	5/140
6_Member	GO Biological Processes	GO:1904375	regulation of protein localization to cell periphery	-3.09224	-0.940306	2239,5347,11004,89958	GPC4,PLK1,KIF2C,SAPCD2	4/155
6_Member	Reactome Gene Sets	R-HSA-194315	Signaling by Rho GTPases	-1.63504	0	2697,5347,11004,55789,57514	GJA1,PLK1,KIF2C,DEPDC1B,ARHGAP31	5/605
6_Member	Reactome Gene Sets	R-HSA-9716542	Signaling by Rho GTPases, Miro GTPases and RHOBTB3	-1.5976	0	2697,5347,11004,55789,57514	GJA1,PLK1,KIF2C,DEPDC1B,ARHGAP31	5/619
7_Summary	Canonical Pathways	M14	PID AURORA B PATHWAY	-5.43925	-2.81299	332,1058,10112,11004,5347,80119,59,8318,6347,2302,3306,1265,22974	BIRC5,CENPA,KIF20A,KIF2C,PLK1,PIF1,ACTA2,CDC45,CCL2,FOXJ1,HSPA2,CNN2,TPX2	13/-
7_Member	Canonical Pathways	M14	PID AURORA B PATHWAY	-5.43925	-2.81299	332,1058,10112,11004	BIRC5,CENPA,KIF20A,KIF2C	4/39
7_Member	GO Biological Processes	GO:0000281	mitotic cytokinesis	-4.01078	-1.65529	332,1058,5347,10112	BIRC5,CENPA,PLK1,KIF20A	4/89
7_Member	GO Biological Processes	GO:0061640	cytoskeleton-dependent cytokinesis	-3.55304	-1.28632	332,1058,5347,10112	BIRC5,CENPA,PLK1,KIF20A	4/117
7_Member	GO Biological Processes	GO:0000910	cytokinesis	-3.52497	-1.26549	332,1058,5347,10112	BIRC5,CENPA,PLK1,KIF20A	4/119
7_Member	GO Biological Processes	GO:2001251	negative regulation of chromosome organization	-2.85323	-0.756481	332,5347,80119	BIRC5,PLK1,PIF1	3/82
7_Member	GO Biological Processes	GO:0032465	regulation of cytokinesis	-2.67011	-0.606596	332,5347,10112	BIRC5,PLK1,KIF20A	3/95
7_Member	WikiPathways	WP4657	22q11 2 copy number variation syndrome	-2.33411	-0.320228	59,5347,8318	ACTA2,PLK1,CDC45	3/125
7_Member	GO Biological Processes	GO:1901988	negative regulation of cell cycle phase transition	-2.3021	-0.294284	332,5347,6347,8318	BIRC5,PLK1,CCL2,CDC45	4/256
7_Member	GO Biological Processes	GO:0001578	microtubule bundle formation	-2.25028	-0.269739	2302,5347,10112	FOXJ1,PLK1,KIF20A	3/134
7_Member	GO Biological Processes	GO:0010948	negative regulation of cell cycle process	-2.04852	-0.11956	332,5347,6347,8318	BIRC5,PLK1,CCL2,CDC45	4/303
7_Member	GO Biological Processes	GO:0022411	cellular component disassembly	-2.03877	-0.113149	3306,5347,11004,80119	HSPA2,PLK1,KIF2C,PIF1	4/305
7_Member	GO Biological Processes	GO:0000075	cell cycle checkpoint signaling	-1.97482	-0.0590645	332,5347,8318	BIRC5,PLK1,CDC45	3/169
7_Member	GO Biological Processes	GO:0051129	negative regulation of cellular component organization	-1.86792	0	332,1265,3306,5347,22974,80119	BIRC5,CNN2,HSPA2,PLK1,TPX2,PIF1	6/730
7_Member	GO Biological Processes	GO:0010639	negative regulation of organelle organization	-1.84582	0	332,5347,22974,80119	BIRC5,PLK1,TPX2,PIF1	4/348
7_Member	GO Biological Processes	GO:0051302	regulation of cell division	-1.83866	0	332,5347,10112	BIRC5,PLK1,KIF20A	3/190
7_Member	GO Biological Processes	GO:1901991	negative regulation of mitotic cell cycle phase transition	-1.8326	0	332,5347,6347	BIRC5,PLK1,CCL2	3/191
7_Member	GO Biological Processes	GO:0045786	negative regulation of cell cycle	-1.67611	0	332,5347,6347,8318	BIRC5,PLK1,CCL2,CDC45	4/392
7_Member	GO Biological Processes	GO:0045930	negative regulation of mitotic cell cycle	-1.57385	0	332,5347,6347	BIRC5,PLK1,CCL2	3/240
8_Summary	WikiPathways	WP5115	Network map of SARS CoV 2 signaling	-5.25882	-2.66475	332,891,3434,6241,6347,9133,9540,1277,2697,8463,27077	BIRC5,CCNB1,IFIT1,RRM2,CCL2,CCNB2,TP53I3,COL1A1,GJA1,TEAD2,B9D1	11/-
8_Member	WikiPathways	WP5115	Network map of SARS CoV 2 signaling	-5.25882	-2.66475	332,891,3434,6241,6347,9133,9540	BIRC5,CCNB1,IFIT1,RRM2,CCL2,CCNB2,TP53I3	7/254
8_Member	KEGG Pathway	hsa04115	p53 signaling pathway	-4.3014	-1.91337	891,6241,9133,9540	CCNB1,RRM2,CCNB2,TP53I3	4/75
8_Member	GO Biological Processes	GO:0043009	chordate embryonic development	-2.71689	-0.639445	891,1277,2697,6241,8463,9133,27077	CCNB1,COL1A1,GJA1,RRM2,TEAD2,CCNB2,B9D1	7/658
8_Member	GO Biological Processes	GO:0009792	embryo development ending in birth or egg hatching	-2.63677	-0.575538	891,1277,2697,6241,8463,9133,27077	CCNB1,COL1A1,GJA1,RRM2,TEAD2,CCNB2,B9D1	7/680
8_Member	GO Biological Processes	GO:0001701	in utero embryonic development	-2.3683	-0.346179	891,2697,6241,9133,27077	CCNB1,GJA1,RRM2,CCNB2,B9D1	5/397
9_Summary	GO Biological Processes	GO:0002064	epithelial cell development	-4.8184	-2.32123	59,2302,2487,2697,3642,7298,27077,6876,9133,928,85301	ACTA2,FOXJ1,FRZB,GJA1,INSM1,TYMS,B9D1,TAGLN,CCNB2,CD9,COL27A1	11/-
9_Member	GO Biological Processes	GO:0002064	epithelial cell development	-4.8184	-2.32123	59,2302,2487,2697,3642,7298	ACTA2,FOXJ1,FRZB,GJA1,INSM1,TYMS	6/197
9_Member	GO Biological Processes	GO:0002066	columnar/cuboidal epithelial cell development	-3.58916	-1.29611	2697,3642,7298	GJA1,INSM1,TYMS	3/46
9_Member	GO Biological Processes	GO:0002065	columnar/cuboidal epithelial cell differentiation	-3.58163	-1.29245	2697,3642,7298,27077	GJA1,INSM1,TYMS,B9D1	4/115
9_Member	GO Biological Processes	GO:0030855	epithelial cell differentiation	-3.47348	-1.22843	59,2302,2487,2697,3642,6876,7298,27077	ACTA2,FOXJ1,FRZB,GJA1,INSM1,TAGLN,TYMS,B9D1	8/646
9_Member	GO Biological Processes	GO:0048732	gland development	-2.23198	-0.25893	2487,2697,3642,7298,9133	FRZB,GJA1,INSM1,TYMS,CCNB2	5/428
9_Member	GO Biological Processes	GO:0031099	regeneration	-2.03913	-0.113149	928,2697,7298	CD9,GJA1,TYMS	3/160
9_Member	GO Biological Processes	GO:0048469	cell maturation	-1.83866	0	2302,2697,7298	FOXJ1,GJA1,TYMS	3/190
9_Member	GO Biological Processes	GO:0071695	anatomical structure maturation	-1.57385	0	2302,2697,7298	FOXJ1,GJA1,TYMS	3/240
9_Member	GO Biological Processes	GO:0040007	growth	-1.51289	0	928,2697,7298,85301	CD9,GJA1,TYMS,COL27A1	4/441
9_Member	GO Biological Processes	GO:0048589	developmental growth	-1.51289	0	928,2697,7298,85301	CD9,GJA1,TYMS,COL27A1	4/441
9_Member	GO Biological Processes	GO:0021700	developmental maturation	-1.35975	0	2302,2697,7298	FOXJ1,GJA1,TYMS	3/292
10_Summary	WikiPathways	WP3646	Hepatitis C and hepatocellular carcinoma	-4.80438	-2.31338	332,1870,2487,6241	BIRC5,E2F2,FRZB,RRM2	4/-
10_Member	WikiPathways	WP3646	Hepatitis C and hepatocellular carcinoma	-4.80438	-2.31338	332,1870,2487,6241	BIRC5,E2F2,FRZB,RRM2	4/56
11_Summary	WikiPathways	WP3888	VEGFA VEGFR2 signaling	-4.68155	-2.20852	332,811,1466,1490,2697,3490,3693,6347,59,1277,8463,27077,55203,85301,121643	BIRC5,CALR,CSRP2,CCN2,GJA1,IGFBP7,ITGB5,CCL2,ACTA2,COL1A1,TEAD2,B9D1,LGI2,COL27A1,FOXN4	15/-
11_Member	WikiPathways	WP3888	VEGFA VEGFR2 signaling	-4.68155	-2.20852	332,811,1466,1490,2697,3490,3693,6347	BIRC5,CALR,CSRP2,CCN2,GJA1,IGFBP7,ITGB5,CCL2	8/432
11_Member	GO Biological Processes	GO:0001944	vasculature development	-3.91401	-1.58458	59,1277,1490,2697,3490,6347,8463,27077	ACTA2,COL1A1,CCN2,GJA1,IGFBP7,CCL2,TEAD2,B9D1	8/556
11_Member	GO Biological Processes	GO:0001568	blood vessel development	-3.24031	-1.07124	59,1277,1490,2697,3490,6347,8463	ACTA2,COL1A1,CCN2,GJA1,IGFBP7,CCL2,TEAD2	7/534
11_Member	Canonical Pathways	M5884	NABA CORE MATRISOME	-3.06091	-0.922768	1277,1490,3490,55203,85301	COL1A1,CCN2,IGFBP7,LGI2,COL27A1	5/275
11_Member	GO Biological Processes	GO:0032526	response to retinoic acid	-2.53506	-0.487257	1277,3490,8463	COL1A1,IGFBP7,TEAD2	3/106
11_Member	GO Biological Processes	GO:0048514	blood vessel morphogenesis	-2.17833	-0.218744	1490,2697,3490,6347,8463	CCN2,GJA1,IGFBP7,CCL2,TEAD2	5/441
11_Member	GO Biological Processes	GO:0035239	tube morphogenesis	-1.96751	-0.0549972	1490,2697,3490,6347,8463,121643	CCN2,GJA1,IGFBP7,CCL2,TEAD2,FOXN4	6/694
11_Member	Canonical Pathways	M3008	NABA ECM GLYCOPROTEINS	-1.80287	0	1490,3490,55203	CCN2,IGFBP7,LGI2	3/196
11_Member	WikiPathways	WP5087	Pleural mesothelioma	-1.51909	0	59,1490,6347,8463	ACTA2,CCN2,CCL2,TEAD2	4/439
12_Summary	GO Biological Processes	GO:0097435	supramolecular fiber organization	-4.44313	-2.01468	1264,1265,1277,1466,3693,7169,11004,22974,83481,811,2302,2697,57626,85301,928,1490	CNN1,CNN2,COL1A1,CSRP2,ITGB5,TPM2,KIF2C,TPX2,EPPK1,CALR,FOXJ1,GJA1,KLHL1,COL27A1,CD9,CCN2	16/-
12_Member	GO Biological Processes	GO:0097435	supramolecular fiber organization	-4.44313	-2.01468	1264,1265,1277,1466,3693,7169,11004,22974,83481	CNN1,CNN2,COL1A1,CSRP2,ITGB5,TPM2,KIF2C,TPX2,EPPK1	9/608
12_Member	GO Biological Processes	GO:0030029	actin filament-based process	-4.39917	-1.98632	811,1264,1265,1466,2302,2697,3693,7169,57626	CALR,CNN1,CNN2,CSRP2,FOXJ1,GJA1,ITGB5,TPM2,KLHL1	9/616
12_Member	GO Biological Processes	GO:0030036	actin cytoskeleton organization	-3.96815	-1.62589	811,1264,1265,1466,2302,3693,7169,57626	CALR,CNN1,CNN2,CSRP2,FOXJ1,ITGB5,TPM2,KLHL1	8/546
12_Member	GO Biological Processes	GO:0031032	actomyosin structure organization	-3.47033	-1.22843	1264,1265,1466,3693	CNN1,CNN2,CSRP2,ITGB5	4/123
12_Member	KEGG Pathway	hsa04820	Cytoskeleton in muscle cells	-3.39434	-1.18241	1277,1466,3693,7169,85301	COL1A1,CSRP2,ITGB5,TPM2,COL27A1	5/232
12_Member	GO Biological Processes	GO:0007015	actin filament organization	-2.17719	-0.218744	1264,1265,3693,7169	CNN1,CNN2,ITGB5,TPM2	4/278
12_Member	GO Biological Processes	GO:0009611	response to wounding	-2.15023	-0.197132	928,1265,1490,3693,83481	CD9,CNN2,CCN2,ITGB5,EPPK1	5/448
12_Member	GO Biological Processes	GO:0042060	wound healing	-1.90101	0	928,1265,3693,83481	CD9,CNN2,ITGB5,EPPK1	4/335
13_Summary	GO Biological Processes	GO:0071675	regulation of mononuclear cell migration	-4.30538	-1.91337	811,928,1265,4282,6347,2697,83481,4598,2302,3306,3434,59	CALR,CD9,CNN2,MIF,CCL2,GJA1,EPPK1,MVK,FOXJ1,HSPA2,IFIT1,ACTA2	12/-
13_Member	GO Biological Processes	GO:0071675	regulation of mononuclear cell migration	-4.30538	-1.91337	811,928,1265,4282,6347	CALR,CD9,CNN2,MIF,CCL2	5/148
13_Member	GO Biological Processes	GO:0071676	negative regulation of mononuclear cell migration	-3.87248	-1.5596	1265,4282,6347	CNN2,MIF,CCL2	3/37
13_Member	GO Biological Processes	GO:1905521	regulation of macrophage migration	-3.56135	-1.29096	928,1265,4282	CD9,CNN2,MIF	3/47
13_Member	GO Biological Processes	GO:0002685	regulation of leukocyte migration	-3.36051	-1.16437	811,928,1265,4282,6347	CALR,CD9,CNN2,MIF,CCL2	5/236
13_Member	GO Biological Processes	GO:0002686	negative regulation of leukocyte migration	-3.31335	-1.12944	1265,4282,6347	CNN2,MIF,CCL2	3/57
13_Member	GO Biological Processes	GO:0030336	negative regulation of cell migration	-3.21105	-1.04776	811,1265,2697,4282,6347,83481	CALR,CNN2,GJA1,MIF,CCL2,EPPK1	6/388
13_Member	GO Biological Processes	GO:2000146	negative regulation of cell motility	-3.12531	-0.970568	811,1265,2697,4282,6347,83481	CALR,CNN2,GJA1,MIF,CCL2,EPPK1	6/403
13_Member	GO Biological Processes	GO:0040013	negative regulation of locomotion	-3.02723	-0.897153	811,1265,2697,4282,6347,83481	CALR,CNN2,GJA1,MIF,CCL2,EPPK1	6/421
13_Member	GO Biological Processes	GO:0050764	regulation of phagocytosis	-2.58234	-0.530109	811,1265,6347	CALR,CNN2,CCL2	3/102
13_Member	WikiPathways	WP2431	Spinal cord injury	-2.38359	-0.355871	2697,4282,6347	GJA1,MIF,CCL2	3/120
13_Member	GO Biological Processes	GO:0002688	regulation of leukocyte chemotaxis	-2.31492	-0.305097	811,4282,6347	CALR,MIF,CCL2	3/127
13_Member	GO Biological Processes	GO:0032102	negative regulation of response to external stimulus	-2.16221	-0.206178	928,4282,4598,6347,83481	CD9,MIF,MVK,CCL2,EPPK1	5/445
13_Member	GO Biological Processes	GO:0050920	regulation of chemotaxis	-1.68685	0	811,4282,6347	CALR,MIF,CCL2	3/217
13_Member	GO Biological Processes	GO:0050900	leukocyte migration	-1.56923	0	1265,2302,6347	CNN2,FOXJ1,CCL2	3/241
13_Member	GO Biological Processes	GO:0032944	regulation of mononuclear cell proliferation	-1.53749	0	1265,2302,4282	CNN2,FOXJ1,MIF	3/248
13_Member	Reactome Gene Sets	R-HSA-1280215	Cytokine Signaling in Immune system	-1.51612	0	1265,3306,3434,4282,6347	CNN2,HSPA2,IFIT1,MIF,CCL2	5/651
13_Member	GO Biological Processes	GO:0050865	regulation of cell activation	-1.5112	0	59,928,2302,4282,6347	ACTA2,CD9,FOXJ1,MIF,CCL2	5/653
13_Member	GO Biological Processes	GO:0070663	regulation of leukocyte proliferation	-1.43227	0	1265,2302,4282	CNN2,FOXJ1,MIF	3/273
14_Summary	WikiPathways	WP5036	Angiotensin II receptor type 1 pathway	-4.24002	-1.87548	59,1277,1490,891,64759,85301,6347,7298,2487,2697,4762,3693,3306,6876,23428,811,3642,11149,965,1265	ACTA2,COL1A1,CCN2,CCNB1,TNS3,COL27A1,CCL2,TYMS,FRZB,GJA1,NEUROG1,ITGB5,HSPA2,TAGLN,SLC7A8,CALR,INSM1,POPDC1,CD58,CNN2	20/-
14_Member	WikiPathways	WP5036	Angiotensin II receptor type 1 pathway	-4.24002	-1.87548	59,1277,1490	ACTA2,COL1A1,CCN2	3/28
14_Member	WikiPathways	WP5422	IL19 signaling	-4.24002	-1.87548	59,891,1277	ACTA2,CCNB1,COL1A1	3/28
14_Member	Reactome Gene Sets	R-HSA-8875878	MET promotes cell motility	-4.10515	-1.74515	1277,64759,85301	COL1A1,TNS3,COL27A1	3/31
14_Member	WikiPathways	WP4747	Netrin UNC5B signaling	-3.43105	-1.20936	1277,1490,6347	COL1A1,CCN2,CCL2	3/52
14_Member	GO Biological Processes	GO:0061448	connective tissue development	-3.37735	-1.1718	59,1277,1490,7298,85301	ACTA2,COL1A1,CCN2,TYMS,COL27A1	5/234
14_Member	GO Biological Processes	GO:0001501	skeletal system development	-3.35365	-1.1606	1277,1490,2487,2697,4762,7298,85301	COL1A1,CCN2,FRZB,GJA1,NEUROG1,TYMS,COL27A1	7/511
14_Member	Reactome Gene Sets	R-HSA-6806834	Signaling by MET	-3.24785	-1.07584	1277,64759,85301	COL1A1,TNS3,COL27A1	3/60
14_Member	Reactome Gene Sets	R-HSA-3000171	Non-integrin membrane-ECM interactions	-3.1657	-1.00813	59,1277,3693	ACTA2,COL1A1,ITGB5	3/64
14_Member	WikiPathways	WP5158	Urotensin II mediated signaling	-3.07035	-0.929486	59,1277,3306	ACTA2,COL1A1,HSPA2	3/69
14_Member	WikiPathways	WP5055	Burn wound healing	-2.96517	-0.845625	1277,6347,6876	COL1A1,CCL2,TAGLN	3/75
14_Member	GO Biological Processes	GO:0051216	cartilage development	-2.89698	-0.79276	1277,1490,7298,85301	COL1A1,CCN2,TYMS,COL27A1	4/175
14_Member	GO Biological Processes	GO:0060348	bone development	-2.69289	-0.624779	1277,2697,4762,85301	COL1A1,GJA1,NEUROG1,COL27A1	4/199
14_Member	GO Biological Processes	GO:0060349	bone morphogenesis	-2.60674	-0.547774	1277,4762,85301	COL1A1,NEUROG1,COL27A1	3/100
14_Member	KEGG Pathway	hsa04974	Protein digestion and absorption	-2.54669	-0.496685	1277,23428,85301	COL1A1,SLC7A8,COL27A1	3/105
14_Member	GO Biological Processes	GO:0048705	skeletal system morphogenesis	-2.45994	-0.423031	1277,1490,4762,85301	COL1A1,CCN2,NEUROG1,COL27A1	4/231
14_Member	GO Biological Processes	GO:0044344	cellular response to fibroblast growth factor stimulus	-2.25028	-0.269739	1277,1490,6347	COL1A1,CCN2,CCL2	3/134
14_Member	GO Biological Processes	GO:0071774	response to fibroblast growth factor	-2.18079	-0.218744	1277,1490,6347	COL1A1,CCN2,CCL2	3/142
14_Member	Reactome Gene Sets	R-HSA-1474244	Extracellular matrix organization	-2.16105	-0.206178	59,1277,3693,85301	ACTA2,COL1A1,ITGB5,COL27A1	4/281
14_Member	GO Biological Processes	GO:0040017	positive regulation of locomotion	-2.11137	-0.165303	59,811,1277,3642,6347,11149	ACTA2,CALR,COL1A1,INSM1,CCL2,POPDC1	6/646
14_Member	GO Biological Processes	GO:0071356	cellular response to tumor necrosis factor	-2.07663	-0.139177	965,1277,6347	CD58,COL1A1,CCL2	3/155
14_Member	GO Biological Processes	GO:0071560	cellular response to transforming growth factor beta stimulus	-2.01725	-0.0949428	59,1277,3693	ACTA2,COL1A1,ITGB5	3/163
14_Member	GO Biological Processes	GO:0071559	response to transforming growth factor beta	-1.96791	-0.0549972	59,1277,3693	ACTA2,COL1A1,ITGB5	3/170
14_Member	GO Biological Processes	GO:0034612	response to tumor necrosis factor	-1.89482	0	965,1277,6347	CD58,COL1A1,CCL2	3/181
14_Member	GO Biological Processes	GO:0071363	cellular response to growth factor stimulus	-1.85685	0	59,1277,1490,3693,6347	ACTA2,COL1A1,CCN2,ITGB5,CCL2	5/530
14_Member	GO Biological Processes	GO:0070848	response to growth factor	-1.75753	0	59,1277,1490,3693,6347	ACTA2,COL1A1,CCN2,ITGB5,CCL2	5/562
14_Member	GO Biological Processes	GO:0009612	response to mechanical stimulus	-1.65607	0	1265,1277,4762	CNN2,COL1A1,NEUROG1	3/223
14_Member	GO Biological Processes	GO:0030335	positive regulation of cell migration	-1.64869	0	59,811,1277,3642,6347	ACTA2,CALR,COL1A1,INSM1,CCL2	5/600
14_Member	GO Biological Processes	GO:2000147	positive regulation of cell motility	-1.56897	0	59,811,1277,3642,6347	ACTA2,CALR,COL1A1,INSM1,CCL2	5/630
14_Member	GO Biological Processes	GO:0001503	ossification	-1.35245	0	1277,1490,2697	COL1A1,CCN2,GJA1	3/294
15_Summary	WikiPathways	WP5117	Cohesin complex Cornelia de Lange syndrome	-3.9834	-1.63677	5347,9232,113130,1490,7298,8318,80119,11065	PLK1,PTTG1,CDCA5,CCN2,TYMS,CDC45,PIF1,UBE2C	8/-
15_Member	WikiPathways	WP5117	Cohesin complex Cornelia de Lange syndrome	-3.9834	-1.63677	5347,9232,113130	PLK1,PTTG1,CDCA5	3/34
15_Member	GO Biological Processes	GO:0006259	DNA metabolic process	-2.41168	-0.379045	1490,5347,7298,8318,9232,80119,113130	CCN2,PLK1,TYMS,CDC45,PTTG1,PIF1,CDCA5	7/747
15_Member	Reactome Gene Sets	R-HSA-69242	S Phase	-2.27752	-0.277675	8318,11065,113130	CDC45,UBE2C,CDCA5	3/131
15_Member	GO Biological Processes	GO:0006281	DNA repair	-1.88617	0	5347,8318,9232,80119,113130	PLK1,CDC45,PTTG1,PIF1,CDCA5	5/521
15_Member	GO Biological Processes	GO:0006302	double-strand break repair	-1.67134	0	5347,8318,113130	PLK1,CDC45,CDCA5	3/220
16_Summary	Reactome Gene Sets	R-HSA-202733	Cell surface interactions at the vascular wall	-3.56727	-1.29096	965,1277,4282,23428,928,10112,11004	CD58,COL1A1,MIF,SLC7A8,CD9,KIF20A,KIF2C	7/-
16_Member	Reactome Gene Sets	R-HSA-202733	Cell surface interactions at the vascular wall	-3.56727	-1.29096	965,1277,4282,23428	CD58,COL1A1,MIF,SLC7A8	4/116
16_Member	Reactome Gene Sets	R-HSA-109582	Hemostasis	-3.23552	-1.06935	928,965,1277,4282,10112,11004,23428	CD9,CD58,COL1A1,MIF,KIF20A,KIF2C,SLC7A8	7/535
17_Summary	WikiPathways	WP4534	Mechanoregulation and pathology of YAP TAZ via Hippo and non Hippo mechanisms	-3.56135	-1.29096	59,3693,8463,1490,332,11149,2487	ACTA2,ITGB5,TEAD2,CCN2,BIRC5,POPDC1,FRZB	7/-
17_Member	WikiPathways	WP4534	Mechanoregulation and pathology of YAP TAZ via Hippo and non Hippo mechanisms	-3.56135	-1.29096	59,3693,8463	ACTA2,ITGB5,TEAD2	3/47
17_Member	WikiPathways	WP4541	Hippo Merlin signaling dysregulation	-2.37352	-0.349319	1490,3693,8463	CCN2,ITGB5,TEAD2	3/121
17_Member	KEGG Pathway	hsa04390	Hippo signaling pathway	-2.06147	-0.130826	332,1490,8463	BIRC5,CCN2,TEAD2	3/157
17_Member	GO Biological Processes	GO:0031589	cell-substrate adhesion	-1.87575	0	1490,3693,11149	CCN2,ITGB5,POPDC1	3/184
17_Member	GO Biological Processes	GO:0060485	mesenchyme development	-1.53749	0	59,2487,8463	ACTA2,FRZB,TEAD2	3/248
18_Summary	KEGG Pathway	hsa05166	Human T-cell leukemia virus 1 infection	-3.464	-1.22554	811,1870,2224,9133,9232,2697,3306,3490,6218,6347,11065,965	CALR,E2F2,FDPS,CCNB2,PTTG1,GJA1,HSPA2,IGFBP7,RPS17,CCL2,UBE2C,CD58	12/-
18_Member	KEGG Pathway	hsa05166	Human T-cell leukemia virus 1 infection	-3.464	-1.22554	811,1870,2224,9133,9232	CALR,E2F2,FDPS,CCNB2,PTTG1	5/224
18_Member	Reactome Gene Sets	R-HSA-8953897	Cellular responses to stimuli	-2.91185	-0.802582	811,1870,2697,3306,3490,6218,6347,11065	CALR,E2F2,GJA1,HSPA2,IGFBP7,RPS17,CCL2,UBE2C	8/788
18_Member	Reactome Gene Sets	R-HSA-2262752	Cellular responses to stress	-2.60142	-0.544714	811,1870,3306,3490,6218,6347,11065	CALR,E2F2,HSPA2,IGFBP7,RPS17,CCL2,UBE2C	7/690
18_Member	Reactome Gene Sets	R-HSA-2559583	Cellular Senescence	-2.07663	-0.139177	1870,3490,11065	E2F2,IGFBP7,UBE2C	3/155
18_Member	KEGG Pathway	hsa05169	Epstein-Barr virus infection	-1.75706	0	811,965,1870	CALR,CD58,E2F2	3/204
18_Member	KEGG Pathway	hsa05163	Human cytomegalovirus infection	-1.64104	0	811,1870,6347	CALR,E2F2,CCL2	3/226
19_Summary	WikiPathways	WP2005	miR targeted genes in muscle cell	-3.427	-1.20858	1277,1595,2697,5347,7169,7298	COL1A1,CYP51A1,GJA1,PLK1,TPM2,TYMS	6/-
19_Member	WikiPathways	WP2005	miR targeted genes in muscle cell	-3.427	-1.20858	1277,1595,2697,5347,7169,7298	COL1A1,CYP51A1,GJA1,PLK1,TPM2,TYMS	6/353
19_Member	WikiPathways	WP2004	miR targeted genes in lymphocytes	-1.56682	0	1595,5347,7169,7298	CYP51A1,PLK1,TPM2,TYMS	4/424
20_Summary	WikiPathways	WP289	Myometrial relaxation and contraction pathways	-3.08183	-0.932694	59,1264,1265,2697,4762,7169,1595,144453	ACTA2,CNN1,CNN2,GJA1,NEUROG1,TPM2,CYP51A1,BEST3	8/-
20_Member	WikiPathways	WP289	Myometrial relaxation and contraction pathways	-3.08183	-0.932694	59,1264,1265,2697	ACTA2,CNN1,CNN2,GJA1	4/156
20_Member	GO Biological Processes	GO:0006936	muscle contraction	-2.42034	-0.385571	59,2697,4762,7169	ACTA2,GJA1,NEUROG1,TPM2	4/237
20_Member	GO Biological Processes	GO:0003012	muscle system process	-2.07824	-0.139177	59,2697,4762,7169	ACTA2,GJA1,NEUROG1,TPM2	4/297
20_Member	GO Biological Processes	GO:0051051	negative regulation of transport	-2.07661	-0.139177	1265,1595,2697,4762,144453	CNN2,CYP51A1,GJA1,NEUROG1,BEST3	5/467
20_Member	GO Biological Processes	GO:0051048	negative regulation of secretion	-1.93404	-0.0247482	1595,2697,4762	CYP51A1,GJA1,NEUROG1	3/175
