# Supplementary material for: Targeting p75NTR activity alleviates the neurotoxic effect of high glucose on iPSC-derived dopaminergic neurons
Source: Research Square preprint supplement (doi:10.21203/rs.3.rs-7184834/v1), 2025-09-23
Supplement: Supplementary file 2 [file 7778f4b6e599d570502ecbf8.xlsx]

## Sheet: Annotation
MyList	Gene ID	Type	Tax ID	Homologene Gene ID	Homologene Gene Tax ID	R-HSA-379716 Cytosolic tRNA aminoacylation	GO:0098974 postsynaptic actin cytoskeleto	GO:0000226 microtubule cytoskeleton organ	GO:0006520 amino acid metabolic process	R-HSA-3214841 PKMTs methylate histone lysine	R-HSA-9648895 Response of EIF2AK1 (HRI) to h	WP5269 Genetic causes of porto sinuso	GO:0060271 cilium assembly	GO:0060348 bone development	GO:0015695 organic cation transport	GO:0034453 microtubule anchoring	GO:0032727 positive regulation of interfe	M200 PID ERA GENOMIC PATHWAY	GO:0042594 response to starvation	GO:0033365 protein localization to organe	GO:0060322 head development	GO:0001578 microtubule bundle formation	GO:0006366 transcription by RNA polymeras	R-HSA-3108232 SUMO E3 ligases SUMOylate targ	GO:0030261 chromosome condensation
ADAM20	8748	symbol	H. sapiens	8748	H. sapiens	0	0	0	0	0	0	0	0	0	0	0	0	0	0	0	0	0	0	1	0
ADGRA1-AS1	100128127	symbol	H. sapiens	100128127	H. sapiens	0	0	0	0	0	0	0	0	0	0	0	0	0	0	0	0	0	0	0	0
ADM2	79924	symbol	H. sapiens	79924	H. sapiens	0	0	0	0	0	0	0	0	0	0	0	0	0	0	0	0	0	0	0	0
AGPAT1	10554	symbol	H. sapiens	10554	H. sapiens	0	0	0	0	0	0	0	0	0	0	0	1	0	0	0	0	0	0	0	0
AKAP9	10142	symbol	H. sapiens	10142	H. sapiens	0	0	1	0	0	0	0	0	0	0	0	0	1	0	0	0	0	0	0	0
ALG11	440138	symbol	H. sapiens	440138	H. sapiens	0	0	0	0	0	0	0	0	0	0	0	0	0	0	0	0	0	0	0	0
ALMS1P	200420	gene_synonym	H. sapiens	200420	H. sapiens	0	0	0	0	0	0	0	0	0	0	0	0	0	0	0	0	0	0	0	0
ANKRD11	29123	symbol	H. sapiens	29123	H. sapiens	0	0	0	0	0	0	0	0	1	0	0	0	0	0	0	1	0	0	0	0
ANKRD26	22852	symbol	H. sapiens	22852	H. sapiens	0	0	0	0	0	0	0	0	0	0	0	0	0	0	0	0	0	0	0	0
ANKRD36	375248	symbol	H. sapiens	375248	H. sapiens	0	0	0	0	0	0	0	0	0	0	0	0	0	0	0	0	0	0	0	0
ANO4	121601	symbol	H. sapiens	121601	H. sapiens	0	0	0	0	0	0	0	0	0	1	0	0	0	0	0	0	0	0	0	0
ASH1L	55870	symbol	H. sapiens	55870	H. sapiens	0	0	0	0	1	0	0	0	1	0	0	0	0	0	0	1	1	1	0	0
ASNS	440	symbol	H. sapiens	440	H. sapiens	0	0	0	1	0	1	0	0	0	0	0	0	0	1	0	0	0	0	0	0
ASS1	445	symbol	H. sapiens	445	H. sapiens	0	0	0	1	0	0	0	0	0	0	0	1	1	1	0	0	0	0	0	0
ATE1-AS1	100130887	gene_synonym	H. sapiens	100130887	H. sapiens	0	0	0	0	0	0	0	0	0	0	0	0	0	0	0	0	0	0	0	0
ATF5	22809	symbol	H. sapiens	22809	H. sapiens	0	0	0	0	0	1	0	0	0	0	0	0	0	0	0	1	0	0	0	0
ATXN2L	11273	symbol	H. sapiens	11273	H. sapiens	0	0	1	0	0	0	0	0	0	0	0	0	0	0	0	0	0	0	0	0
BEND6	221336	symbol	H. sapiens	221336	H. sapiens	0	0	0	0	0	0	1	0	0	0	0	0	0	0	0	0	0	0	0	0
BICD1	636	symbol	H. sapiens	636	H. sapiens	0	0	1	0	0	0	0	0	0	0	1	0	0	0	1	0	1	0	0	0
BMS1P21	100288974	symbol	H. sapiens	100288974	H. sapiens	0	0	0	0	0	0	0	0	0	0	0	0	0	0	0	0	0	0	0	0
BMS1P4	729096	symbol	H. sapiens	729096	H. sapiens	0	0	0	0	0	0	0	0	0	0	0	0	0	0	0	0	0	0	0	0
BNC2	54796	symbol	H. sapiens	54796	H. sapiens	0	0	0	0	0	0	0	0	1	0	0	0	0	0	0	0	0	0	0	0
C10orf12	84458	gene_synonym	H. sapiens	84458	H. sapiens	0	0	0	0	0	0	0	0	0	0	0	0	1	0	0	0	0	0	0	0
C11orf63	79864	gene_synonym	H. sapiens	79864	H. sapiens	0	0	1	0	0	0	0	1	0	0	0	0	0	0	0	1	1	0	0	0
C1orf27	54953	gene_synonym	H. sapiens	54953	H. sapiens	0	0	0	0	0	0	0	0	0	0	0	0	0	0	0	0	0	0	0	0
CACNG2	10369	symbol	H. sapiens	10369	H. sapiens	0	1	0	0	0	0	0	0	0	0	0	1	0	0	1	0	0	0	0	0
CADM2	253559	symbol	H. sapiens	253559	H. sapiens	0	0	0	0	0	0	0	0	0	0	0	0	0	0	0	0	0	0	0	0
CARS	833	gene_synonym	H. sapiens	833	H. sapiens	1	0	0	1	0	0	0	0	0	0	1	0	0	0	0	0	0	0	0	0
CCDC144B	284047	gene_synonym	H. sapiens	284047	H. sapiens	0	0	0	0	0	0	0	0	0	0	0	0	0	0	0	0	0	0	0	0
CCDC144CP	348254	symbol	H. sapiens	348254	H. sapiens	0	0	0	0	0	0	0	0	0	0	0	0	0	0	0	0	0	0	0	0
CCDC168	643677	symbol	H. sapiens	643677	H. sapiens	0	0	0	0	0	0	0	0	0	0	0	0	0	0	0	0	0	0	0	0
CCDC171	203238	symbol	H. sapiens	203238	H. sapiens	0	0	0	0	0	0	0	0	0	0	0	0	0	0	0	0	0	0	0	0
CCDC175	729665	symbol	H. sapiens	729665	H. sapiens	0	0	0	0	0	0	0	0	0	0	0	0	0	0	0	0	0	0	0	0
CCDC30	728621	symbol	H. sapiens	728621	H. sapiens	0	0	0	0	0	0	0	0	0	0	0	0	0	0	0	0	0	0	0	0
CCDC66	285331	symbol	H. sapiens	285331	H. sapiens	0	0	1	0	0	0	0	1	0	0	0	0	0	0	0	0	1	0	0	0
CCSER1	401145	symbol	H. sapiens	401145	H. sapiens	0	0	0	0	0	0	0	0	0	0	0	0	0	0	0	0	0	0	0	0
CEP290	80184	symbol	H. sapiens	80184	H. sapiens	0	0	0	1	0	0	0	1	0	0	0	0	0	0	0	1	0	0	0	0
CEP350	9857	symbol	H. sapiens	9857	H. sapiens	0	0	1	0	0	0	0	1	0	0	1	0	0	0	1	0	0	0	0	0
CEP89	84902	symbol	H. sapiens	84902	H. sapiens	0	0	0	0	0	0	0	1	0	0	0	0	0	0	0	0	0	0	0	0
CFAP43	80217	symbol	H. sapiens	80217	H. sapiens	0	0	1	0	0	0	0	1	0	0	0	0	0	0	0	1	1	0	0	0
CHAC1	79094	symbol	H. sapiens	79094	H. sapiens	0	0	0	0	0	1	0	0	0	0	0	0	0	0	0	0	0	0	0	0
CNTNAP5	129684	symbol	H. sapiens	129684	H. sapiens	0	0	0	0	0	0	0	0	0	0	0	0	0	0	0	0	0	0	0	0
COX16	51241	symbol	H. sapiens	51241	H. sapiens	0	0	0	0	0	0	0	0	0	0	0	0	0	0	0	0	0	0	0	0
CREG2	200407	symbol	H. sapiens	200407	H. sapiens	0	0	0	0	0	0	0	0	0	0	0	0	0	0	0	0	0	0	0	0
DAB1	1600	symbol	H. sapiens	1600	H. sapiens	0	1	0	0	0	0	0	0	0	0	0	0	0	0	0	1	0	0	0	0
DDX59	83479	symbol	H. sapiens	83479	H. sapiens	0	0	0	0	0	0	0	0	0	0	0	0	0	0	0	0	0	0	0	0
DHX36	170506	symbol	H. sapiens	170506	H. sapiens	0	0	0	0	0	0	0	0	0	0	0	1	0	0	0	0	0	0	1	0
DNAH14	127602	symbol	H. sapiens	127602	H. sapiens	0	0	0	0	0	0	0	0	0	0	0	0	0	0	0	0	1	0	0	0
DNAJC21	134218	symbol	H. sapiens	134218	H. sapiens	0	0	0	0	0	0	0	0	0	0	0	0	0	0	0	0	0	0	0	0
EEA1	8411	symbol	H. sapiens	8411	H. sapiens	0	0	0	0	0	0	0	0	0	0	0	0	0	0	0	0	0	0	0	0
EGFL6	25975	symbol	H. sapiens	25975	H. sapiens	0	0	0	0	0	0	0	0	0	0	0	0	0	0	0	0	0	0	0	0
EIF4EBP1	1978	symbol	H. sapiens	1978	H. sapiens	1	0	1	0	0	0	0	0	0	0	0	0	0	0	0	0	0	0	0	0
EML5	161436	symbol	H. sapiens	161436	H. sapiens	0	0	0	0	0	0	0	0	0	0	0	0	0	0	0	0	0	0	0	0
ESF1	51575	symbol	H. sapiens	51575	H. sapiens	0	0	0	0	0	0	0	0	0	0	0	0	0	0	0	0	0	0	0	0
ESR2	2100	symbol	H. sapiens	2100	H. sapiens	0	0	0	0	0	0	0	0	0	0	0	0	1	0	0	0	0	0	0	0
F10	2159	symbol	H. sapiens	2159	H. sapiens	0	0	0	0	0	0	0	0	0	0	0	0	0	0	0	0	0	0	0	0
FAM129A	116496	gene_synonym	H. sapiens	116496	H. sapiens	0	0	0	0	0	0	0	0	0	0	0	0	0	0	0	0	0	0	0	0
FAM13C	220965	symbol	H. sapiens	220965	H. sapiens	0	0	0	0	0	0	0	0	0	0	0	0	0	0	0	0	0	0	0	0
FAM171B	165215	symbol	H. sapiens	165215	H. sapiens	0	0	0	0	0	0	0	0	0	0	0	0	0	0	0	0	0	0	0	0
FAM184A	79632	symbol	H. sapiens	79632	H. sapiens	0	0	0	0	0	0	0	0	0	0	0	0	0	0	0	0	0	0	0	0
FBXO25	26260	symbol	H. sapiens	26260	H. sapiens	0	0	0	0	0	0	0	0	0	0	0	0	0	0	0	0	0	0	0	0
FIGN	55137	symbol	H. sapiens	55137	H. sapiens	0	0	1	0	0	0	0	0	0	0	0	0	0	0	0	0	0	0	0	0
FILIP1L	11259	symbol	H. sapiens	11259	H. sapiens	0	0	0	0	0	0	0	0	0	0	0	0	0	0	1	0	0	0	0	0
FOXP1	27086	symbol	H. sapiens	27086	H. sapiens	0	0	0	0	0	0	0	0	1	0	0	1	0	0	0	1	0	0	0	0
FSIP2	401024	symbol	H. sapiens	401024	H. sapiens	0	0	1	0	0	0	0	1	0	0	0	0	0	0	1	0	1	0	0	0
GABRA3	2556	symbol	H. sapiens	2556	H. sapiens	0	1	0	0	0	0	0	0	0	0	0	0	0	0	0	0	0	0	0	0
GCC2	9648	symbol	H. sapiens	9648	H. sapiens	0	0	1	0	0	0	0	0	0	0	1	0	0	0	1	0	0	0	0	0
GPATCH8	23131	symbol	H. sapiens	23131	H. sapiens	0	0	0	0	0	0	0	0	0	0	0	0	0	0	0	0	0	0	0	0
GTF2I	2969	symbol	H. sapiens	2969	H. sapiens	0	0	0	0	0	0	1	0	0	0	0	0	0	0	0	0	0	1	0	0
HERC2	8924	symbol	H. sapiens	8924	H. sapiens	0	0	0	0	0	0	0	0	0	0	0	0	0	0	0	0	0	0	1	0
HIST1H1C	3006	gene_synonym	H. sapiens	3006	H. sapiens	0	0	0	0	0	0	0	0	0	0	0	0	0	0	0	0	0	0	1	1
HIST1H1E	3008	gene_synonym	H. sapiens	3008	H. sapiens	0	0	0	0	1	0	0	0	0	0	0	0	0	0	0	0	0	0	1	1
HIST1H4C	8364	gene_synonym	H. sapiens	8364	H. sapiens	0	0	0	0	1	1	0	0	0	0	0	0	0	0	1	0	0	0	1	1
HMOX1	3162	symbol	H. sapiens	3162	H. sapiens	0	0	0	0	0	1	0	0	0	1	0	1	0	0	0	0	0	0	0	0
HRK	8739	symbol	H. sapiens	8739	H. sapiens	0	0	0	0	0	0	0	0	0	0	0	0	0	0	0	0	0	0	0	0
IFT74	80173	symbol	H. sapiens	80173	H. sapiens	0	0	0	0	0	0	0	1	0	0	0	0	0	0	0	0	1	0	0	0
JMJD1C	221037	symbol	H. sapiens	221037	H. sapiens	0	0	0	0	1	0	0	0	0	0	0	0	0	0	0	0	0	0	0	0
JMY	133746	symbol	H. sapiens	133746	H. sapiens	0	0	0	0	0	0	0	0	0	0	0	0	0	1	0	0	0	0	0	0
JPH4	84502	symbol	H. sapiens	84502	H. sapiens	0	0	0	0	0	0	0	0	0	0	0	0	0	0	0	0	0	0	0	0
KCNB1	3745	symbol	H. sapiens	3745	H. sapiens	0	0	0	0	0	0	0	0	0	0	0	1	0	1	0	0	0	0	0	0
KCNH7	90134	symbol	H. sapiens	90134	H. sapiens	0	0	0	0	0	0	0	0	0	0	0	0	0	0	0	0	0	0	0	0
KIAA1551	55196	gene_synonym	H. sapiens	55196	H. sapiens	0	0	0	0	0	0	0	0	0	0	0	0	0	0	0	0	0	0	0	0
KLF3	51274	symbol	H. sapiens	51274	H. sapiens	0	0	0	0	0	0	0	0	0	0	0	0	0	0	0	0	0	0	0	0
KLF3-AS1	79667	symbol	H. sapiens	79667	H. sapiens	0	0	0	0	0	0	0	0	0	0	0	0	0	0	0	0	0	0	0	0
KLHDC7B	113730	symbol	H. sapiens	113730	H. sapiens	0	0	0	0	0	0	0	0	0	0	0	0	0	0	0	0	0	0	0	0
KPNA5	3841	symbol	H. sapiens	3841	H. sapiens	0	0	0	0	0	0	0	0	0	0	0	0	0	0	1	0	0	0	0	0
LARS	51520	gene_synonym	H. sapiens	51520	H. sapiens	1	0	0	1	0	0	0	0	0	0	0	0	0	1	0	0	0	0	0	0
LGI4	163175	symbol	H. sapiens	163175	H. sapiens	0	0	0	0	0	0	0	0	0	0	0	0	0	0	0	0	0	0	0	0
LINC00324	284029	symbol	H. sapiens	284029	H. sapiens	0	0	0	0	0	0	0	0	0	0	0	0	0	0	0	0	0	0	0	0
LOC101927550	101927550	Gene_ID	H. sapiens	101927550	H. sapiens	0	0	0	0	0	0	0	0	0	0	0	0	0	0	0	0	0	0	0	0
LOC101928673	101928673	Gene_ID	H. sapiens	101928673	H. sapiens	0	0	0	0	0	0	0	0	0	0	0	0	0	0	0	0	0	0	0	0
LOC339529	339529	Gene_ID	H. sapiens	339529	H. sapiens	0	0	0	0	0	0	0	0	0	0	0	0	0	0	0	0	0	0	0	0
LOC440910	440910	Gene_ID	H. sapiens	440910	H. sapiens	0	0	0	0	0	0	0	0	0	0	0	0	0	0	0	0	0	0	0	0
LOC441204	441204	Gene_ID	H. sapiens	441204	H. sapiens	0	0	0	0	0	0	0	0	0	0	0	0	0	0	0	0	0	0	0	0
LOC728730	728730	Gene_ID	H. sapiens	728730	H. sapiens	0	0	0	0	0	0	0	0	0	0	0	0	0	0	0	0	0	0	0	0
LRIF1	55791	symbol	H. sapiens	55791	H. sapiens	0	0	0	0	0	0	0	0	0	0	0	0	0	0	0	0	0	0	0	0
LTN1	26046	symbol	H. sapiens	26046	H. sapiens	1	0	0	0	0	0	0	0	0	0	0	0	0	0	0	0	0	0	0	0
LURAP1L-AS1	101929467	symbol	H. sapiens	101929467	H. sapiens	0	0	0	0	0	0	0	0	0	0	0	0	0	0	0	0	0	0	0	0
LZIC	84328	symbol	H. sapiens	84328	H. sapiens	0	0	0	0	0	0	0	0	0	0	0	0	0	0	0	0	0	0	0	0
MAP7D2	256714	symbol	H. sapiens	256714	H. sapiens	0	0	1	0	0	0	0	0	0	0	0	0	0	0	0	0	0	0	0	0
MBD5	55777	symbol	H. sapiens	55777	H. sapiens	0	0	0	0	0	0	0	0	0	0	0	0	0	0	0	0	0	0	0	0
MEGF9	1955	symbol	H. sapiens	1955	H. sapiens	0	0	0	0	0	0	0	0	0	0	0	0	0	0	0	0	0	0	0	0
MMP16	4325	symbol	H. sapiens	4325	H. sapiens	0	0	0	0	0	0	0	0	1	0	0	0	0	0	0	0	0	0	0	0
N4BP2	55728	symbol	H. sapiens	55728	H. sapiens	0	0	0	0	0	0	0	0	0	0	0	0	0	0	0	0	0	0	0	0
N4BP2L2	10443	symbol	H. sapiens	10443	H. sapiens	0	0	0	0	0	0	0	0	0	0	0	0	0	0	0	0	0	0	0	0
NCOA2	10499	symbol	H. sapiens	10499	H. sapiens	0	0	0	0	1	1	0	0	0	0	0	0	1	0	0	0	0	1	1	0
NCOA7	135112	symbol	H. sapiens	135112	H. sapiens	0	0	0	0	0	0	0	0	0	0	0	0	1	0	0	0	0	0	0	0
NOC3L	64318	symbol	H. sapiens	64318	H. sapiens	0	0	0	0	0	0	0	0	0	0	0	0	0	0	0	0	0	0	0	0
NOS1AP	9722	symbol	H. sapiens	9722	H. sapiens	0	1	0	0	0	0	0	0	0	0	0	0	0	0	0	0	0	0	0	0
NPIPB11	728888	symbol	H. sapiens	728888	H. sapiens	0	0	0	0	0	0	0	0	0	0	0	0	0	0	0	0	0	0	0	0
NSD1	64324	symbol	H. sapiens	64324	H. sapiens	0	0	0	0	1	0	0	0	0	0	0	0	0	0	0	0	0	0	0	0
NUMA1	4926	symbol	H. sapiens	4926	H. sapiens	0	0	1	0	0	0	0	0	0	0	0	0	0	0	0	0	1	0	0	0
NUPR1	26471	symbol	H. sapiens	26471	H. sapiens	0	0	0	0	0	0	0	0	0	0	0	0	0	0	0	0	0	0	0	0
ONECUT1	3175	symbol	H. sapiens	3175	H. sapiens	0	0	0	0	0	0	0	1	0	0	0	0	0	1	0	0	0	0	0	0
PAPPA2	60676	symbol	H. sapiens	60676	H. sapiens	0	0	0	0	0	0	0	0	1	0	0	0	0	0	0	0	0	0	0	0
PCDHA5	56143	symbol	H. sapiens	56143	H. sapiens	0	0	0	0	0	0	0	0	0	0	0	0	0	0	0	0	0	0	0	0
PCDHGA12	26025	symbol	H. sapiens	26025	H. sapiens	0	0	0	0	0	0	0	0	0	0	0	0	0	0	0	0	0	0	0	0
PCK2	5106	symbol	H. sapiens	5106	H. sapiens	0	0	0	0	0	0	0	0	0	0	0	0	1	1	0	0	0	0	0	0
PCLO	27445	symbol	H. sapiens	27445	H. sapiens	0	1	0	0	0	0	0	0	0	0	0	0	0	0	0	0	0	0	0	0
PEX5L	51555	symbol	H. sapiens	51555	H. sapiens	0	0	0	0	0	0	0	0	0	0	0	0	0	0	1	0	0	0	0	0
PHGDH	26227	symbol	H. sapiens	26227	H. sapiens	0	0	0	1	0	0	0	0	0	0	0	0	0	0	0	1	0	0	0	0
PLCB1	23236	symbol	H. sapiens	23236	H. sapiens	0	0	1	0	0	0	0	0	0	0	0	1	1	0	0	1	0	0	0	0
PLEKHA8P1	51054	symbol	H. sapiens	51054	H. sapiens	0	0	0	0	0	0	0	0	0	1	0	0	0	0	0	0	0	0	0	0
POTEE	445582	symbol	H. sapiens	445582	H. sapiens	0	1	0	0	0	0	0	0	0	0	0	0	0	0	0	1	0	0	0	0
POTEF	728378	symbol	H. sapiens	728378	H. sapiens	0	1	0	0	0	0	0	0	0	0	0	0	0	0	0	0	0	0	0	0
POTEI	653269	symbol	H. sapiens	653269	H. sapiens	0	1	0	0	0	0	0	0	0	0	0	0	0	0	0	0	0	0	0	0
POU6F2	11281	symbol	H. sapiens	11281	H. sapiens	0	0	0	0	0	0	0	0	0	0	0	0	0	0	0	0	0	0	0	0
PRICKLE1	144165	symbol	H. sapiens	144165	H. sapiens	0	1	1	0	0	0	0	1	0	0	0	0	0	0	1	1	0	0	1	0
PRKAR2A	5576	symbol	H. sapiens	5576	H. sapiens	0	0	0	0	0	1	0	0	0	1	0	0	0	0	0	0	0	0	0	0
PRRG3	79057	symbol	H. sapiens	79057	H. sapiens	0	0	0	0	0	0	0	0	0	0	0	0	0	0	0	0	0	0	0	0
PUS7L	83448	symbol	H. sapiens	83448	H. sapiens	0	0	0	0	0	0	0	0	0	0	0	0	0	0	0	0	0	0	0	0
PWAR1	145624	symbol	H. sapiens	145624	H. sapiens	0	0	0	0	0	0	0	0	0	0	0	0	0	0	0	0	0	0	0	0
PYCR1	5831	symbol	H. sapiens	5831	H. sapiens	0	0	0	1	0	0	0	0	0	0	0	0	0	0	0	0	0	0	0	0
RBBP8	5932	symbol	H. sapiens	5932	H. sapiens	0	0	1	0	0	0	0	0	0	0	0	0	0	0	0	0	0	0	0	0
RBM12B	389677	symbol	H. sapiens	389677	H. sapiens	0	0	0	0	0	0	0	0	0	0	0	0	0	0	0	0	0	0	0	0
RBM27	54439	symbol	H. sapiens	54439	H. sapiens	0	0	0	0	0	0	0	0	0	0	0	0	0	0	0	0	0	0	0	0
RGS7BP	401190	symbol	H. sapiens	401190	H. sapiens	0	0	0	0	0	0	0	0	0	0	0	0	0	0	0	0	0	0	0	0
RHEBL1	121268	symbol	H. sapiens	121268	H. sapiens	0	0	0	0	0	0	0	0	0	0	0	0	0	0	0	0	0	0	0	0
RN7SL1	6029	symbol	H. sapiens	6029	H. sapiens	0	0	0	0	0	0	0	0	0	0	0	0	0	0	1	0	0	0	0	0
RN7SL2	378706	symbol	H. sapiens	378706	H. sapiens	0	0	0	0	0	0	0	0	0	0	0	0	0	0	1	0	0	0	0	0
RNA18S5	110255169	symbol	H. sapiens	110255169	H. sapiens	0	0	0	0	0	0	0	0	0	0	0	0	0	0	0	0	0	0	0	0
RNA28S5	110255168	symbol	H. sapiens	110255168	H. sapiens	0	0	0	0	0	0	0	0	0	0	0	0	0	0	0	0	0	0	0	0
RNF115	27246	symbol	H. sapiens	27246	H. sapiens	0	0	0	0	0	0	0	0	0	0	0	0	0	0	0	0	0	0	0	0
RNPC3	55599	symbol	H. sapiens	55599	H. sapiens	0	0	0	0	0	0	0	0	0	0	0	0	0	0	0	0	0	0	0	0
RNU4ATAC	100151683	symbol	H. sapiens	100151683	H. sapiens	0	0	0	0	0	0	0	0	0	0	0	0	0	0	0	0	0	0	0	0
RNU6ATAC	100151684	symbol	H. sapiens	100151684	H. sapiens	0	0	0	0	0	0	0	0	0	0	0	0	0	0	0	0	0	0	0	0
RPL17	6139	symbol	H. sapiens	6139	H. sapiens	1	0	0	1	0	1	0	0	0	0	0	0	0	0	0	0	0	0	0	0
RPL23AP53	644128	symbol	H. sapiens	644128	H. sapiens	0	0	0	0	0	0	0	0	0	0	0	0	0	0	0	0	0	0	0	0
SAMD1	90378	symbol	H. sapiens	90378	H. sapiens	0	0	0	0	0	0	0	0	0	0	0	0	0	0	0	0	0	0	0	0
SARS	6301	gene_synonym	H. sapiens	6301	H. sapiens	1	0	0	1	0	0	0	0	0	0	0	0	0	0	0	0	0	0	0	0
SBDS	51119	symbol	H. sapiens	51119	H. sapiens	0	0	1	0	0	0	1	0	1	0	0	0	0	0	0	0	0	0	0	0
SBDSP1	155370	symbol	H. sapiens	155370	H. sapiens	0	0	0	0	0	0	0	0	0	0	0	0	0	0	0	0	0	0	0	0
SCARNA9	619383	symbol	H. sapiens	619383	H. sapiens	0	0	0	0	0	0	0	0	0	0	0	0	0	0	0	0	0	0	0	0
SCYL2	55681	symbol	H. sapiens	55681	H. sapiens	0	0	0	0	0	0	0	0	0	0	0	0	0	0	0	1	0	0	0	0
SEC31A	22872	symbol	H. sapiens	22872	H. sapiens	0	0	0	0	0	1	0	0	0	0	1	1	0	0	0	0	0	0	0	0
SETD2	29072	symbol	H. sapiens	29072	H. sapiens	0	0	1	1	1	0	0	0	1	0	0	1	0	0	0	1	0	1	0	1
SETD8	387893	gene_synonym	H. sapiens	387893	H. sapiens	0	0	1	0	1	0	0	0	0	0	0	0	0	0	0	0	0	0	1	1
SH3BP5	9467	symbol	H. sapiens	9467	H. sapiens	0	0	0	0	0	0	0	0	0	0	0	0	0	0	0	0	0	0	0	0
SHMT2	6472	symbol	H. sapiens	6472	H. sapiens	0	0	0	1	0	0	0	0	0	0	0	0	0	0	0	0	0	0	0	0
SHOX2	6474	symbol	H. sapiens	6474	H. sapiens	0	0	0	0	0	0	0	0	1	0	0	0	0	0	0	0	0	0	0	0
SLC16A9	220963	symbol	H. sapiens	220963	H. sapiens	0	0	0	0	0	0	0	0	0	1	0	0	0	0	0	0	0	0	0	0
SLC1A5	6510	symbol	H. sapiens	6510	H. sapiens	0	0	0	1	0	0	0	0	0	1	0	0	0	0	0	0	0	0	0	0
SLC39A7	7922	symbol	H. sapiens	7922	H. sapiens	0	0	0	0	0	0	0	0	0	1	0	0	0	0	0	0	0	0	0	0
SLC4A10	57282	symbol	H. sapiens	57282	H. sapiens	0	0	0	0	0	0	0	0	0	1	0	0	0	0	0	1	0	0	0	0
SLC7A3	84889	symbol	H. sapiens	84889	H. sapiens	0	0	0	0	0	0	0	0	0	1	0	0	0	0	0	0	0	0	0	0
SLC7A5	8140	symbol	H. sapiens	8140	H. sapiens	0	0	0	1	0	0	0	0	0	1	0	1	1	1	0	0	0	0	0	0
SLCO1A2	6579	symbol	H. sapiens	6579	H. sapiens	0	0	0	0	0	0	0	0	0	1	0	0	0	0	0	0	0	0	0	0
SLCO5A1	81796	symbol	H. sapiens	81796	H. sapiens	0	0	0	0	0	0	0	0	0	1	0	0	0	0	0	0	0	0	0	0
SLX4IP	128710	symbol	H. sapiens	128710	H. sapiens	0	0	0	0	0	0	0	0	0	0	0	0	0	0	0	0	0	0	0	0
SMC3	9126	symbol	H. sapiens	9126	H. sapiens	0	0	1	0	0	0	0	0	0	0	0	0	0	0	0	0	0	0	1	0
SMC6	79677	symbol	H. sapiens	79677	H. sapiens	0	0	0	0	1	0	0	0	0	0	0	0	0	0	0	0	0	0	1	0
SMDT1	91689	symbol	H. sapiens	91689	H. sapiens	0	0	0	0	0	0	0	0	0	1	0	0	0	1	0	0	0	0	0	0
SNHG1	23642	symbol	H. sapiens	23642	H. sapiens	0	0	0	0	0	0	0	0	0	0	0	0	0	0	0	0	0	0	0	0
SNORD26	9302	symbol	H. sapiens	9302	H. sapiens	0	0	0	0	0	0	0	0	0	0	0	0	0	0	0	0	0	0	0	0
SNORD50A	26799	symbol	H. sapiens	26799	H. sapiens	0	0	0	0	0	0	0	0	0	0	0	0	0	0	0	0	0	0	0	0
SOGA3	387104	gene_synonym	H. sapiens	387104	H. sapiens	0	0	0	0	0	0	0	0	0	0	0	0	0	0	0	0	0	0	0	0
SP140	11262	symbol	H. sapiens	11262	H. sapiens	0	0	0	0	0	0	0	0	0	0	0	0	0	0	0	0	0	0	0	0
SYCP2	10388	symbol	H. sapiens	10388	H. sapiens	0	0	0	0	0	0	0	0	0	0	0	0	0	0	0	0	0	0	1	0
SYNE1	23345	symbol	H. sapiens	23345	H. sapiens	0	0	0	0	0	0	0	0	0	0	0	0	0	0	1	0	0	0	0	0
TAF13	6884	symbol	H. sapiens	6884	H. sapiens	0	0	0	0	0	0	0	0	0	0	0	0	0	0	0	0	0	1	0	1
TCEA1	6917	symbol	H. sapiens	6917	H. sapiens	0	0	0	0	0	0	0	0	0	0	0	0	0	0	0	0	0	1	0	0
TENM2	57451	symbol	H. sapiens	57451	H. sapiens	0	0	0	0	0	0	0	0	0	0	0	0	0	0	0	0	0	0	0	0
TES	26136	symbol	H. sapiens	26136	H. sapiens	0	0	0	0	0	0	0	0	0	0	0	0	0	0	0	0	0	0	0	0
TET2	54790	symbol	H. sapiens	54790	H. sapiens	0	0	0	0	0	0	0	0	0	0	0	0	0	0	0	0	0	1	0	0
TIMM44	10469	symbol	H. sapiens	10469	H. sapiens	0	0	0	0	0	0	0	0	0	0	0	0	0	0	1	0	0	0	0	0
TLR9	54106	symbol	H. sapiens	54106	H. sapiens	0	0	0	0	0	0	1	0	0	0	0	1	1	0	0	0	0	0	0	0
TMED8	283578	symbol	H. sapiens	283578	H. sapiens	0	0	0	0	0	0	0	0	0	0	0	0	0	0	0	0	0	0	0	0
TNIK	23043	symbol	H. sapiens	23043	H. sapiens	0	0	0	0	0	1	0	1	0	0	0	1	0	0	0	0	0	0	0	0
TRIM66	9866	symbol	H. sapiens	9866	H. sapiens	0	0	0	0	0	0	0	0	0	0	0	0	0	0	0	0	0	0	0	0
TRIP11	9321	symbol	H. sapiens	9321	H. sapiens	0	0	0	0	0	0	0	0	1	0	0	0	0	0	0	0	0	1	0	0
TTC3P1	286495	symbol	H. sapiens	286495	H. sapiens	0	0	0	0	0	0	0	0	0	0	0	0	0	0	0	0	0	0	0	0
TXLNG	55787	symbol	H. sapiens	55787	H. sapiens	0	0	0	0	0	0	0	0	0	0	0	0	0	0	0	0	0	0	0	0
UHRF1BP1L	23074	gene_synonym	H. sapiens	23074	H. sapiens	0	0	0	0	0	0	0	0	0	0	0	0	0	0	0	0	0	0	0	0
UNC5B	219699	symbol	H. sapiens	219699	H. sapiens	0	1	0	0	0	0	0	0	0	0	0	0	0	0	0	0	0	0	0	0
URI1	8725	symbol	H. sapiens	8725	H. sapiens	0	0	0	0	0	0	0	0	0	0	0	0	1	0	0	0	0	0	0	0
UTP23	84294	symbol	H. sapiens	84294	H. sapiens	0	0	0	0	0	0	0	0	0	0	0	0	0	0	0	0	0	0	0	0
WARS	7453	gene_synonym	H. sapiens	7453	H. sapiens	1	0	0	1	0	0	0	0	0	0	0	0	0	0	0	0	0	0	0	0
WDR70	55100	symbol	H. sapiens	55100	H. sapiens	0	0	0	0	0	0	0	0	0	0	0	0	0	0	0	0	0	0	0	0
YARS	8565	gene_synonym	H. sapiens	8565	H. sapiens	1	0	0	1	0	0	0	0	0	0	0	0	0	1	0	0	0	0	0	0
ZC3H13	23091	symbol	H. sapiens	23091	H. sapiens	0	0	0	0	0	0	0	0	0	0	0	0	0	0	0	0	0	0	0	0
ZC3H8	84524	symbol	H. sapiens	84524	H. sapiens	0	0	0	0	0	0	0	0	0	0	0	0	0	0	0	0	0	1	0	0
ZFYVE9	9372	symbol	H. sapiens	9372	H. sapiens	0	0	0	0	0	0	0	0	0	0	0	0	0	0	0	0	0	0	0	0
ZMAT1	84460	symbol	H. sapiens	84460	H. sapiens	0	0	0	0	0	0	0	0	0	0	0	0	0	0	0	0	0	0	0	0
ZNF397	84307	symbol	H. sapiens	84307	H. sapiens	0	0	0	0	0	0	0	0	0	0	0	0	0	0	0	0	0	0	0	0
ZNF462	58499	symbol	H. sapiens	58499	H. sapiens	0	0	0	0	0	0	0	0	0	0	0	0	0	0	0	0	0	0	0	0
ZNF608	57507	symbol	H. sapiens	57507	H. sapiens	0	0	0	0	0	0	0	0	0	0	0	0	0	0	0	0	0	0	0	0
ZNF638	27332	symbol	H. sapiens	27332	H. sapiens	0	0	0	0	0	0	0	0	0	0	0	0	0	0	0	0	0	0	0	0
ZNF790	388536	symbol	H. sapiens	388536	H. sapiens	0	0	0	0	0	0	0	0	0	0	0	0	0	0	0	0	0	0	0	0
ZNF808	388558	symbol	H. sapiens	388558	H. sapiens	0	0	0	0	0	0	0	0	0	0	0	0	0	0	0	0	0	0	0	0

## Sheet: Enrichment
GroupID	Category	Term	Description	LogP	Log(q-value)	Genes	Symbols	InTerm_InList
1_Summary	Reactome Gene Sets	R-HSA-379716	Cytosolic tRNA aminoacylation	-6.47822	-2.13489	833,6301,7453,8565,51520,1978,6139,26046	CARS1,SARS1,WARS1,YARS1,LARS1,EIF4EBP1,RPL17,LTN1	8/-
1_Member	Reactome Gene Sets	R-HSA-379716	Cytosolic tRNA aminoacylation	-6.47822	-2.13489	833,6301,7453,8565,51520	CARS1,SARS1,WARS1,YARS1,LARS1	5/22
1_Member	Reactome Gene Sets	R-HSA-379724	tRNA Aminoacylation	-5.2365	-1.36872	833,6301,7453,8565,51520	CARS1,SARS1,WARS1,YARS1,LARS1	5/38
1_Member	GO Biological Processes	GO:0006418	tRNA aminoacylation for protein translation	-5.06964	-1.36872	833,6301,7453,8565,51520	CARS1,SARS1,WARS1,YARS1,LARS1	5/41
1_Member	GO Biological Processes	GO:0043039	tRNA aminoacylation	-4.91571	-1.36872	833,6301,7453,8565,51520	CARS1,SARS1,WARS1,YARS1,LARS1	5/44
1_Member	GO Biological Processes	GO:0043038	amino acid activation	-4.86695	-1.36872	833,6301,7453,8565,51520	CARS1,SARS1,WARS1,YARS1,LARS1	5/45
1_Member	KEGG Pathway	hsa00970	Aminoacyl-tRNA biosynthesis	-4.053	-0.913788	833,6301,7453,8565,51520	CARS1,SARS1,WARS1,YARS1,LARS1	5/66
1_Member	Reactome Gene Sets	R-HSA-72766	Translation	-2.49807	0	833,1978,6139,6301,7453,8565,51520	CARS1,EIF4EBP1,RPL17,SARS1,WARS1,YARS1,LARS1	7/280
1_Member	GO Biological Processes	GO:0006399	tRNA metabolic process	-1.90833	0	833,6301,7453,8565,51520	CARS1,SARS1,WARS1,YARS1,LARS1	5/201
1_Member	GO Biological Processes	GO:0006412	translation	-1.71198	0	833,6139,6301,7453,8565,26046,51520	CARS1,RPL17,SARS1,WARS1,YARS1,LTN1,LARS1	7/397
1_Member	Reactome Gene Sets	R-HSA-2408522	Selenoamino acid metabolism	-1.36592	0	6139,6301,51520	RPL17,SARS1,LARS1	3/114
2_Summary	GO Biological Processes	GO:0098974	postsynaptic actin cytoskeleton organization	-5.22879	-1.36872	9722,445582,653269,728378,144165,2556,10369,27445,1600,219699	NOS1AP,POTEE,POTEI,POTEF,PRICKLE1,GABRA3,CACNG2,PCLO,DAB1,UNC5B	10/-
2_Member	GO Biological Processes	GO:0098974	postsynaptic actin cytoskeleton organization	-5.22879	-1.36872	9722,445582,653269,728378	NOS1AP,POTEE,POTEI,POTEF	4/18
2_Member	GO Biological Processes	GO:0099188	postsynaptic cytoskeleton organization	-4.77891	-1.33867	9722,445582,653269,728378	NOS1AP,POTEE,POTEI,POTEF	4/23
2_Member	GO Biological Processes	GO:0099173	postsynapse organization	-2.95172	-0.136035	9722,144165,445582,653269,728378	NOS1AP,PRICKLE1,POTEE,POTEI,POTEF	5/114
2_Member	GO Biological Processes	GO:0050808	synapse organization	-2.41284	0	2556,9722,10369,27445,144165,445582,653269,728378	GABRA3,NOS1AP,CACNG2,PCLO,PRICKLE1,POTEE,POTEI,POTEF	8/368
2_Member	GO Biological Processes	GO:0034330	cell junction organization	-1.39168	0	2556,9722,10369,27445,144165,445582,653269,728378	GABRA3,NOS1AP,CACNG2,PCLO,PRICKLE1,POTEE,POTEI,POTEF	8/566
2_Member	GO Biological Processes	GO:0007409	axonogenesis	-1.38141	0	1600,144165,219699,445582,653269,728378	DAB1,PRICKLE1,UNC5B,POTEE,POTEI,POTEF	6/370
3_Summary	GO Biological Processes	GO:0000226	microtubule cytoskeleton organization	-4.955	-1.36872	636,4926,9126,9648,9857,10142,29072,51119,55137,79864,80217,144165,256714,285331,401024,1978,5932,23236,387893,11273	BICD1,NUMA1,SMC3,GCC2,CEP350,AKAP9,SETD2,SBDS,FIGN,JHY,CFAP43,PRICKLE1,MAP7D2,CCDC66,FSIP2,EIF4EBP1,RBBP8,PLCB1,KMT5A,ATXN2L	20/-
3_Member	GO Biological Processes	GO:0000226	microtubule cytoskeleton organization	-4.955	-1.36872	636,4926,9126,9648,9857,10142,29072,51119,55137,79864,80217,144165,256714,285331,401024	BICD1,NUMA1,SMC3,GCC2,CEP350,AKAP9,SETD2,SBDS,FIGN,JHY,CFAP43,PRICKLE1,MAP7D2,CCDC66,FSIP2	15/578
3_Member	GO Biological Processes	GO:1902850	microtubule cytoskeleton organization involved in mitosis	-2.62823	0	4926,9126,29072,51119,144165	NUMA1,SMC3,SETD2,SBDS,PRICKLE1	5/135
3_Member	GO Biological Processes	GO:1903047	mitotic cell cycle process	-2.00303	0	1978,4926,5932,9126,23236,29072,51119,144165,387893	EIF4EBP1,NUMA1,RBBP8,SMC3,PLCB1,SETD2,SBDS,PRICKLE1,KMT5A	9/523
3_Member	GO Biological Processes	GO:0000278	mitotic cell cycle	-1.64106	0	1978,4926,5932,9126,23236,29072,51119,144165,387893	EIF4EBP1,NUMA1,RBBP8,SMC3,PLCB1,SETD2,SBDS,PRICKLE1,KMT5A	9/603
3_Member	GO Biological Processes	GO:0007051	spindle organization	-1.54298	0	4926,9126,51119,144165	NUMA1,SMC3,SBDS,PRICKLE1	4/169
3_Member	GO Biological Processes	GO:0007052	mitotic spindle organization	-1.51978	0	9126,51119,144165	SMC3,SBDS,PRICKLE1	3/99
3_Member	GO Biological Processes	GO:0140694	membraneless organelle assembly	-1.46976	0	636,4926,9126,11273,51119,144165	BICD1,NUMA1,SMC3,ATXN2L,SBDS,PRICKLE1	6/352
3_Member	GO Biological Processes	GO:0051225	spindle assembly	-1.46553	0	4926,9126,144165	NUMA1,SMC3,PRICKLE1	3/104
4_Summary	GO Biological Processes	GO:0006520	amino acid metabolic process	-4.71191	-1.32282	440,445,833,5831,6301,6472,7453,8565,26227,51520,6510,6139,8140,29072,80184	ASNS,ASS1,CARS1,PYCR1,SARS1,SHMT2,WARS1,YARS1,PHGDH,LARS1,SLC1A5,RPL17,SLC7A5,SETD2,CEP290	15/-
4_Member	GO Biological Processes	GO:0006520	amino acid metabolic process	-4.71191	-1.32282	440,445,833,5831,6301,6472,7453,8565,26227,51520	ASNS,ASS1,CARS1,PYCR1,SARS1,SHMT2,WARS1,YARS1,PHGDH,LARS1	10/273
4_Member	GO Biological Processes	GO:0170034	L-amino acid biosynthetic process	-4.324	-1.05985	440,445,5831,6472,26227	ASNS,ASS1,PYCR1,SHMT2,PHGDH	5/58
4_Member	GO Biological Processes	GO:0170038	proteinogenic amino acid biosynthetic process	-4.324	-1.05985	440,445,5831,6472,26227	ASNS,ASS1,PYCR1,SHMT2,PHGDH	5/58
4_Member	GO Biological Processes	GO:1901607	alpha-amino acid biosynthetic process	-4.21778	-0.988398	440,445,5831,6472,26227	ASNS,ASS1,PYCR1,SHMT2,PHGDH	5/61
4_Member	GO Biological Processes	GO:0008652	amino acid biosynthetic process	-3.93085	-0.842789	440,445,5831,6472,26227	ASNS,ASS1,PYCR1,SHMT2,PHGDH	5/70
4_Member	KEGG Pathway	hsa01230	Biosynthesis of amino acids	-3.78865	-0.746349	440,445,5831,6472,26227	ASNS,ASS1,PYCR1,SHMT2,PHGDH	5/75
4_Member	WikiPathways	WP5312	Metabolic pathways of fibroblasts	-2.87607	-0.112521	5831,6510,26227	PYCR1,SLC1A5,PHGDH	3/32
4_Member	Reactome Gene Sets	R-HSA-71291	Metabolism of amino acids and derivatives	-2.65271	0	440,445,5831,6139,6301,8140,26227,51520	ASNS,ASS1,PYCR1,RPL17,SARS1,SLC7A5,PHGDH,LARS1	8/336
4_Member	GO Biological Processes	GO:0009066	aspartate family amino acid metabolic process	-2.56329	0	440,445,26227	ASNS,ASS1,PHGDH	3/41
4_Member	WikiPathways	WP4018	Clear cell renal cell carcinoma pathways	-2.56234	0	6472,26227,29072,80184	SHMT2,PHGDH,SETD2,CEP290	4/85
4_Member	WikiPathways	WP4290	Metabolic reprogramming in colon cancer	-2.53327	0	5831,6472,6510	PYCR1,SHMT2,SLC1A5	3/42
4_Member	WikiPathways	WP3925	Amino acid metabolism	-2.43846	0	440,445,5831,7453	ASNS,ASS1,PYCR1,WARS1	4/92
4_Member	WikiPathways	WP5355	Metabolic epileptic disorders	-2.43846	0	445,6472,6510,26227	ASS1,SHMT2,SLC1A5,PHGDH	4/92
4_Member	GO Biological Processes	GO:0170039	proteinogenic amino acid metabolic process	-2.29054	0	440,445,5831,6472,26227	ASNS,ASS1,PYCR1,SHMT2,PHGDH	5/162
4_Member	GO Biological Processes	GO:0170033	L-amino acid metabolic process	-2.22471	0	440,445,5831,6472,26227	ASNS,ASS1,PYCR1,SHMT2,PHGDH	5/168
4_Member	GO Biological Processes	GO:0009064	glutamine family amino acid metabolic process	-2.07798	0	445,5831,26227	ASS1,PYCR1,PHGDH	3/61
4_Member	GO Biological Processes	GO:1901605	alpha-amino acid metabolic process	-1.96972	0	440,445,5831,6472,26227	ASNS,ASS1,PYCR1,SHMT2,PHGDH	5/194
4_Member	GO Biological Processes	GO:0046394	carboxylic acid biosynthetic process	-1.39922	0	440,445,5831,6472,26227	ASNS,ASS1,PYCR1,SHMT2,PHGDH	5/274
4_Member	GO Biological Processes	GO:0016053	organic acid biosynthetic process	-1.38232	0	440,445,5831,6472,26227	ASNS,ASS1,PYCR1,SHMT2,PHGDH	5/277
5_Summary	Reactome Gene Sets	R-HSA-3214841	PKMTs methylate histone lysines	-4.51526	-1.17193	8364,29072,55870,64324,387893,3008,221037,10499,79677	H4C3,SETD2,ASH1L,NSD1,KMT5A,H1-4,JMJD1C,NCOA2,SMC6	9/-
5_Member	Reactome Gene Sets	R-HSA-3214841	PKMTs methylate histone lysines	-4.51526	-1.17193	8364,29072,55870,64324,387893	H4C3,SETD2,ASH1L,NSD1,KMT5A	5/53
5_Member	WikiPathways	WP2369	Histone modifications	-4.053	-0.913788	8364,29072,55870,64324,387893	H4C3,SETD2,ASH1L,NSD1,KMT5A	5/66
5_Member	KEGG Pathway	hsa00310	Lysine degradation	-3.04333	-0.162396	29072,55870,64324,387893	SETD2,ASH1L,NSD1,KMT5A	4/63
5_Member	WikiPathways	WP3651	Pathways affected in adenoid cystic carcinoma	-2.99231	-0.140339	3008,29072,64324,221037	H1-4,SETD2,NSD1,JMJD1C	4/65
5_Member	Reactome Gene Sets	R-HSA-3247509	Chromatin modifying enzymes	-2.41943	0	8364,10499,29072,55870,64324,387893	H4C3,NCOA2,SETD2,ASH1L,NSD1,KMT5A	6/217
5_Member	Reactome Gene Sets	R-HSA-4839726	Chromatin organization	-2.41943	0	8364,10499,29072,55870,64324,387893	H4C3,NCOA2,SETD2,ASH1L,NSD1,KMT5A	6/217
5_Member	GO Biological Processes	GO:0018205	peptidyl-lysine modification	-1.35655	0	29072,79677,387893	SETD2,SMC6,KMT5A	3/115
6_Summary	Reactome Gene Sets	R-HSA-9648895	Response of EIF2AK1 (HRI) to heme deficiency	-4.1856	-0.988398	440,22809,79094,3162,5576,6139,8364,10499,22872,23043	ASNS,ATF5,CHAC1,HMOX1,PRKAR2A,RPL17,H4C3,NCOA2,SEC31A,TNIK	10/-
6_Member	Reactome Gene Sets	R-HSA-9648895	Response of EIF2AK1 (HRI) to heme deficiency	-4.1856	-0.988398	440,22809,79094	ASNS,ATF5,CHAC1	3/12
6_Member	Reactome Gene Sets	R-HSA-8953897	Cellular responses to stimuli	-1.35638	0	440,3162,5576,6139,8364,10499,22809,22872,23043,79094	ASNS,HMOX1,PRKAR2A,RPL17,H4C3,NCOA2,ATF5,SEC31A,TNIK,CHAC1	10/788
6_Member	Reactome Gene Sets	R-HSA-2262752	Cellular responses to stress	-1.32522	0	440,3162,6139,8364,10499,22809,22872,23043,79094	ASNS,HMOX1,RPL17,H4C3,NCOA2,ATF5,SEC31A,TNIK,CHAC1	9/690
7_Summary	WikiPathways	WP5269	Genetic causes of porto sinusoidal vascular disease	-3.93863	-0.842789	2969,51119,54106,221336	GTF2I,SBDS,TLR9,BEND6	4/-
7_Member	WikiPathways	WP5269	Genetic causes of porto sinusoidal vascular disease	-3.93863	-0.842789	2969,51119,54106,221336	GTF2I,SBDS,TLR9,BEND6	4/37
8_Summary	GO Biological Processes	GO:0060271	cilium assembly	-3.87341	-0.808837	3175,9857,79864,80173,80184,80217,84902,144165,285331,401024,23043	ONECUT1,CEP350,JHY,IFT74,CEP290,CFAP43,CEP89,PRICKLE1,CCDC66,FSIP2,TNIK	11/-
8_Member	GO Biological Processes	GO:0060271	cilium assembly	-3.87341	-0.808837	3175,9857,79864,80173,80184,80217,84902,144165,285331,401024	ONECUT1,CEP350,JHY,IFT74,CEP290,CFAP43,CEP89,PRICKLE1,CCDC66,FSIP2	10/344
8_Member	GO Biological Processes	GO:0120031	plasma membrane bounded cell projection assembly	-3.64366	-0.622549	3175,9857,23043,79864,80173,80184,80217,84902,144165,285331,401024	ONECUT1,CEP350,TNIK,JHY,IFT74,CEP290,CFAP43,CEP89,PRICKLE1,CCDC66,FSIP2	11/439
8_Member	GO Biological Processes	GO:0044782	cilium organization	-3.53609	-0.55419	3175,9857,79864,80173,80184,80217,84902,144165,285331,401024	ONECUT1,CEP350,JHY,IFT74,CEP290,CFAP43,CEP89,PRICKLE1,CCDC66,FSIP2	10/379
8_Member	GO Biological Processes	GO:0030031	cell projection assembly	-3.53579	-0.55419	3175,9857,23043,79864,80173,80184,80217,84902,144165,285331,401024	ONECUT1,CEP350,TNIK,JHY,IFT74,CEP290,CFAP43,CEP89,PRICKLE1,CCDC66,FSIP2	11/452
8_Member	GO Biological Processes	GO:1905515	non-motile cilium assembly	-3.20794	-0.298447	9857,80173,80184,84902	CEP350,IFT74,CEP290,CEP89	4/57
9_Summary	GO Biological Processes	GO:0060348	bone development	-3.3504	-0.38728	4325,6474,9321,27086,51119,54796,60676,29072,29123,55870	MMP16,SHOX2,TRIP11,FOXP1,SBDS,BNC2,PAPPA2,SETD2,ANKRD11,ASH1L	10/-
9_Member	GO Biological Processes	GO:0060348	bone development	-3.3504	-0.38728	4325,6474,9321,27086,51119,54796,60676	MMP16,SHOX2,TRIP11,FOXP1,SBDS,BNC2,PAPPA2	7/199
9_Member	GO Biological Processes	GO:0001501	skeletal system development	-2.55855	0	4325,6474,9321,27086,29072,29123,51119,54796,55870,60676	MMP16,SHOX2,TRIP11,FOXP1,SETD2,ANKRD11,SBDS,BNC2,ASH1L,PAPPA2	10/511
9_Member	GO Biological Processes	GO:0060349	bone morphogenesis	-2.30952	0	4325,6474,9321,60676	MMP16,SHOX2,TRIP11,PAPPA2	4/100
9_Member	GO Biological Processes	GO:0048705	skeletal system morphogenesis	-2.28839	0	4325,6474,9321,29072,29123,60676	MMP16,SHOX2,TRIP11,SETD2,ANKRD11,PAPPA2	6/231
9_Member	GO Biological Processes	GO:0060350	endochondral bone morphogenesis	-2.09773	0	4325,6474,9321	MMP16,SHOX2,TRIP11	3/60
9_Member	GO Biological Processes	GO:0048704	embryonic skeletal system morphogenesis	-1.55392	0	4325,6474,29072	MMP16,SHOX2,SETD2	3/96
10_Summary	GO Biological Processes	GO:0015695	organic cation transport	-3.26889	-0.323496	6510,6579,8140,84889,220963,7922,57282,51054,81796,3162,5576,91689,121601	SLC1A5,SLCO1A2,SLC7A5,SLC7A3,SLC16A9,SLC39A7,SLC4A10,PLEKHA8P1,SLCO5A1,HMOX1,PRKAR2A,SMDT1,ANO4	13/-
10_Member	GO Biological Processes	GO:0015695	organic cation transport	-3.26889	-0.323496	6510,6579,8140,84889,220963	SLC1A5,SLCO1A2,SLC7A5,SLC7A3,SLC16A9	5/97
10_Member	Reactome Gene Sets	R-HSA-352230	Amino acid transport across the plasma membrane	-2.87607	-0.112521	6510,8140,84889	SLC1A5,SLC7A5,SLC7A3	3/32
10_Member	GO Biological Processes	GO:0089718	amino acid import across plasma membrane	-2.65842	0	6510,8140,84889	SLC1A5,SLC7A5,SLC7A3	3/38
10_Member	Reactome Gene Sets	R-HSA-425407	SLC-mediated transmembrane transport	-2.28839	0	6510,6579,7922,8140,57282,84889	SLC1A5,SLCO1A2,SLC39A7,SLC7A5,SLC4A10,SLC7A3	6/231
10_Member	Reactome Gene Sets	R-HSA-425393	Transport of inorganic cations/anions and amino acids/oligopeptides	-2.24946	0	6510,8140,57282,84889	SLC1A5,SLC7A5,SLC4A10,SLC7A3	4/104
10_Member	GO Biological Processes	GO:0015711	organic anion transport	-2.11966	0	6510,6579,8140,51054,57282,81796,84889,220963	SLC1A5,SLCO1A2,SLC7A5,PLEKHA8P1,SLC4A10,SLCO5A1,SLC7A3,SLC16A9	8/413
10_Member	GO Biological Processes	GO:1902475	L-alpha-amino acid transmembrane transport	-1.89855	0	6510,8140,84889	SLC1A5,SLC7A5,SLC7A3	3/71
10_Member	GO Biological Processes	GO:1905039	carboxylic acid transmembrane transport	-1.81841	0	6510,8140,84889,220963	SLC1A5,SLC7A5,SLC7A3,SLC16A9	4/139
10_Member	Reactome Gene Sets	R-HSA-382551	Transport of small molecules	-1.80029	0	3162,5576,6510,6579,7922,8140,57282,84889,91689,121601	HMOX1,PRKAR2A,SLC1A5,SLCO1A2,SLC39A7,SLC7A5,SLC4A10,SLC7A3,SMDT1,ANO4	10/663
10_Member	GO Biological Processes	GO:1903825	organic acid transmembrane transport	-1.77761	0	6510,8140,84889,220963	SLC1A5,SLC7A5,SLC7A3,SLC16A9	4/143
10_Member	GO Biological Processes	GO:0010232	vascular transport	-1.66448	0	6510,8140,84889	SLC1A5,SLC7A5,SLC7A3	3/87
10_Member	GO Biological Processes	GO:0150104	transport across blood-brain barrier	-1.66448	0	6510,8140,84889	SLC1A5,SLC7A5,SLC7A3	3/87
10_Member	GO Biological Processes	GO:0015807	L-amino acid transport	-1.63878	0	6510,8140,84889	SLC1A5,SLC7A5,SLC7A3	3/89
10_Member	GO Biological Processes	GO:0003333	amino acid transmembrane transport	-1.51978	0	6510,8140,84889	SLC1A5,SLC7A5,SLC7A3	3/99
11_Summary	GO Biological Processes	GO:0034453	microtubule anchoring	-3.24796	-0.319605	636,9648,9857,833,22872	BICD1,GCC2,CEP350,CARS1,SEC31A	5/-
11_Member	GO Biological Processes	GO:0034453	microtubule anchoring	-3.24796	-0.319605	636,9648,9857	BICD1,GCC2,CEP350	3/24
11_Member	Reactome Gene Sets	R-HSA-9700206	Signaling by ALK in cancer	-2.02084	0	833,9648,22872	CARS1,GCC2,SEC31A	3/64
11_Member	Reactome Gene Sets	R-HSA-9725370	Signaling by ALK fusions and activated point mutants	-2.02084	0	833,9648,22872	CARS1,GCC2,SEC31A	3/64
12_Summary	GO Biological Processes	GO:0032727	positive regulation of interferon-alpha production	-3.19462	-0.298447	29072,54106,170506,445,3162,3745,10369,22872,23236,27086,8140,10554,23043	SETD2,TLR9,DHX36,ASS1,HMOX1,KCNB1,CACNG2,SEC31A,PLCB1,FOXP1,SLC7A5,AGPAT1,TNIK	13/-
12_Member	GO Biological Processes	GO:0032727	positive regulation of interferon-alpha production	-3.19462	-0.298447	29072,54106,170506	SETD2,TLR9,DHX36	3/25
12_Member	GO Biological Processes	GO:0032647	regulation of interferon-alpha production	-2.91665	-0.129623	29072,54106,170506	SETD2,TLR9,DHX36	3/31
12_Member	GO Biological Processes	GO:0010038	response to metal ion	-2.00959	0	445,3162,3745,10369,22872,29072,54106	ASS1,HMOX1,KCNB1,CACNG2,SEC31A,SETD2,TLR9	7/346
12_Member	GO Biological Processes	GO:0032655	regulation of interleukin-12 production	-2.00246	0	23236,27086,54106	PLCB1,FOXP1,TLR9	3/65
12_Member	GO Biological Processes	GO:0032481	positive regulation of type I interferon production	-1.81935	0	29072,54106,170506	SETD2,TLR9,DHX36	3/76
12_Member	GO Biological Processes	GO:0001819	positive regulation of cytokine production	-1.60188	0	3162,8140,10554,23236,27086,29072,54106,170506	HMOX1,SLC7A5,AGPAT1,PLCB1,FOXP1,SETD2,TLR9,DHX36	8/514
12_Member	GO Biological Processes	GO:0046330	positive regulation of JNK cascade	-1.5424	0	23043,23236,54106	TNIK,PLCB1,TLR9	3/97
12_Member	GO Biological Processes	GO:0032642	regulation of chemokine production	-1.45506	0	3162,27086,54106	HMOX1,FOXP1,TLR9	3/105
13_Summary	Canonical Pathways	M200	PID ERA GENOMIC PATHWAY	-3.0176	-0.151387	2100,10499,84458,135112,445,5106,8725,10142,23236,54106,8140	ESR2,NCOA2,LCOR,NCOA7,ASS1,PCK2,URI1,AKAP9,PLCB1,TLR9,SLC7A5	11/-
13_Member	Canonical Pathways	M200	PID ERA GENOMIC PATHWAY	-3.0176	-0.151387	2100,10499,84458,135112	ESR2,NCOA2,LCOR,NCOA7	4/64
13_Member	GO Biological Processes	GO:0071407	cellular response to organic cyclic compound	-1.79726	0	445,2100,5106,8725,10142,23236,54106,84458	ASS1,ESR2,PCK2,URI1,AKAP9,PLCB1,TLR9,LCOR	8/472
13_Member	GO Biological Processes	GO:0071383	cellular response to steroid hormone stimulus	-1.68149	0	445,2100,5106,8725	ASS1,ESR2,PCK2,URI1	4/153
13_Member	GO Biological Processes	GO:0071396	cellular response to lipid	-1.46877	0	445,2100,5106,8140,8725,23236,54106,84458	ASS1,ESR2,PCK2,SLC7A5,URI1,PLCB1,TLR9,LCOR	8/546
13_Member	GO Biological Processes	GO:0048545	response to steroid hormone	-1.34385	0	445,2100,5106,8725,10499	ASS1,ESR2,PCK2,URI1,NCOA2	5/284
13_Member	GO Biological Processes	GO:0032355	response to estradiol	-1.31115	0	445,2100,84458	ASS1,ESR2,LCOR	3/120
14_Summary	GO Biological Processes	GO:0042594	response to starvation	-2.95868	-0.136035	440,5106,8140,8565,51520,91689,133746,3745,445,3175	ASNS,PCK2,SLC7A5,YARS1,LARS1,SMDT1,JMY,KCNB1,ASS1,ONECUT1	10/-
14_Member	GO Biological Processes	GO:0042594	response to starvation	-2.95868	-0.136035	440,5106,8140,8565,51520,91689,133746	ASNS,PCK2,SLC7A5,YARS1,LARS1,SMDT1,JMY	7/232
14_Member	GO Biological Processes	GO:0031669	cellular response to nutrient levels	-2.13406	0	440,3745,8140,51520,91689,133746	ASNS,KCNB1,SLC7A5,LARS1,SMDT1,JMY	6/249
14_Member	GO Biological Processes	GO:0031667	response to nutrient levels	-2.06983	0	440,445,3745,5106,8140,8565,51520,91689,133746	ASNS,ASS1,KCNB1,PCK2,SLC7A5,YARS1,LARS1,SMDT1,JMY	9/510
14_Member	GO Biological Processes	GO:0009267	cellular response to starvation	-1.9969	0	440,8140,51520,91689,133746	ASNS,SLC7A5,LARS1,SMDT1,JMY	5/191
14_Member	GO Biological Processes	GO:0043200	response to amino acid	-1.90448	0	445,3745,8140,51520	ASS1,KCNB1,SLC7A5,LARS1	4/131
14_Member	GO Biological Processes	GO:0001889	liver development	-1.87147	0	445,3175,5106,8140	ASS1,ONECUT1,PCK2,SLC7A5	4/134
14_Member	GO Biological Processes	GO:0061008	hepaticobiliary system development	-1.83935	0	445,3175,5106,8140	ASS1,ONECUT1,PCK2,SLC7A5	4/137
14_Member	GO Biological Processes	GO:0001101	response to acid chemical	-1.74792	0	445,3745,8140,51520	ASS1,KCNB1,SLC7A5,LARS1	4/146
14_Member	GO Biological Processes	GO:0071230	cellular response to amino acid stimulus	-1.60148	0	445,8140,51520	ASS1,SLC7A5,LARS1	3/92
14_Member	GO Biological Processes	GO:0071229	cellular response to acid chemical	-1.49769	0	445,8140,51520	ASS1,SLC7A5,LARS1	3/101
15_Summary	GO Biological Processes	GO:0033365	protein localization to organelle	-2.94045	-0.136035	636,3841,6029,8364,9648,9857,10369,10469,11259,23345,51555,144165,378706,401024	BICD1,KPNA5,RN7SL1,H4C3,GCC2,CEP350,CACNG2,TIMM44,FILIP1L,SYNE1,PEX5L,PRICKLE1,RN7SL2,FSIP2	14/-
15_Member	GO Biological Processes	GO:0033365	protein localization to organelle	-2.94045	-0.136035	636,3841,6029,8364,9648,9857,10369,10469,11259,23345,51555,144165,378706,401024	BICD1,KPNA5,RN7SL1,H4C3,GCC2,CEP350,CACNG2,TIMM44,FILIP1L,SYNE1,PEX5L,PRICKLE1,RN7SL2,FSIP2	14/794
15_Member	GO Biological Processes	GO:0072594	establishment of protein localization to organelle	-2.44126	0	3841,6029,9648,10369,10469,51555,144165,378706	KPNA5,RN7SL1,GCC2,CACNG2,TIMM44,PEX5L,PRICKLE1,RN7SL2	8/364
15_Member	GO Biological Processes	GO:0006612	protein targeting to membrane	-1.55392	0	6029,10369,378706	RN7SL1,CACNG2,RN7SL2	3/96
15_Member	GO Biological Processes	GO:0006605	protein targeting	-1.45749	0	6029,9648,10369,10469,378706	RN7SL1,GCC2,CACNG2,TIMM44,RN7SL2	5/264
16_Summary	GO Biological Processes	GO:0060322	head development	-2.9353	-0.136035	1600,22809,23236,26227,27086,29072,29123,55681,57282,79864,80184,80217,144165,445582,55870	DAB1,ATF5,PLCB1,PHGDH,FOXP1,SETD2,ANKRD11,SCYL2,SLC4A10,JHY,CEP290,CFAP43,PRICKLE1,POTEE,ASH1L	15/-
16_Member	GO Biological Processes	GO:0060322	head development	-2.9353	-0.136035	1600,22809,23236,26227,27086,29072,29123,55681,57282,79864,80184,80217,144165,445582	DAB1,ATF5,PLCB1,PHGDH,FOXP1,SETD2,ANKRD11,SCYL2,SLC4A10,JHY,CEP290,CFAP43,PRICKLE1,POTEE	14/795
16_Member	GO Biological Processes	GO:0007420	brain development	-2.28135	0	1600,22809,23236,26227,27086,29072,55681,57282,79864,80184,80217,445582	DAB1,ATF5,PLCB1,PHGDH,FOXP1,SETD2,SCYL2,SLC4A10,JHY,CEP290,CFAP43,POTEE	12/745
16_Member	GO Biological Processes	GO:0009791	post-embryonic development	-1.63878	0	22809,55870,57282	ATF5,ASH1L,SLC4A10	3/89
16_Member	GO Biological Processes	GO:0030900	forebrain development	-1.63467	0	1600,22809,23236,27086,29072,55681,57282	DAB1,ATF5,PLCB1,FOXP1,SETD2,SCYL2,SLC4A10	7/412
16_Member	GO Biological Processes	GO:0021954	central nervous system neuron development	-1.5774	0	22809,55681,57282	ATF5,SCYL2,SLC4A10	3/94
16_Member	GO Biological Processes	GO:0035264	multicellular organism growth	-1.51978	0	22809,57282,144165	ATF5,SLC4A10,PRICKLE1	3/99
17_Summary	GO Biological Processes	GO:0001578	microtubule bundle formation	-2.64226	0	4926,79864,80217,285331,401024,55870,127602,636,80173	NUMA1,JHY,CFAP43,CCDC66,FSIP2,ASH1L,DNAH14,BICD1,IFT74	9/-
17_Member	GO Biological Processes	GO:0001578	microtubule bundle formation	-2.64226	0	4926,79864,80217,285331,401024	NUMA1,JHY,CFAP43,CCDC66,FSIP2	5/134
17_Member	GO Biological Processes	GO:0044458	motile cilium assembly	-1.77465	0	79864,80217,401024	JHY,CFAP43,FSIP2	3/79
17_Member	GO Biological Processes	GO:0003341	cilium movement	-1.65205	0	55870,79864,80217,127602,401024	ASH1L,JHY,CFAP43,DNAH14,FSIP2	5/234
17_Member	GO Biological Processes	GO:0035082	axoneme assembly	-1.47612	0	79864,80217,401024	JHY,CFAP43,FSIP2	3/103
17_Member	GO Biological Processes	GO:0007018	microtubule-based movement	-1.46944	0	636,55870,79864,80173,80217,127602,401024	BICD1,ASH1L,JHY,IFT74,CFAP43,DNAH14,FSIP2	7/447
17_Member	GO Biological Processes	GO:0060294	cilium movement involved in cell motility	-1.3708	0	55870,80217,127602,401024	ASH1L,CFAP43,DNAH14,FSIP2	4/192
17_Member	GO Biological Processes	GO:0001539	cilium or flagellum-dependent cell motility	-1.35033	0	55870,80217,127602,401024	ASH1L,CFAP43,DNAH14,FSIP2	4/195
17_Member	GO Biological Processes	GO:0060285	cilium-dependent cell motility	-1.35033	0	55870,80217,127602,401024	ASH1L,CFAP43,DNAH14,FSIP2	4/195
18_Summary	GO Biological Processes	GO:0006366	transcription by RNA polymerase II	-2.63138	0	2969,6884,6917,9321,10499,29072,54790,55870,84524	GTF2I,TAF13,TCEA1,TRIP11,NCOA2,SETD2,TET2,ASH1L,ZC3H8	9/-
18_Member	GO Biological Processes	GO:0006366	transcription by RNA polymerase II	-2.63138	0	2969,6884,6917,9321,10499,29072,54790,55870,84524	GTF2I,TAF13,TCEA1,TRIP11,NCOA2,SETD2,TET2,ASH1L,ZC3H8	9/417
18_Member	GO Biological Processes	GO:0006351	DNA-templated transcription	-1.86722	0	2969,6884,6917,9321,10499,29072,54790,55870,84524	GTF2I,TAF13,TCEA1,TRIP11,NCOA2,SETD2,TET2,ASH1L,ZC3H8	9/551
19_Summary	Reactome Gene Sets	R-HSA-3108232	SUMO E3 ligases SUMOylate target proteins	-2.53338	0	8364,8924,9126,10499,79677,3006,3008,10388,144165,170506,387893,8748	H4C3,HERC2,SMC3,NCOA2,SMC6,H1-2,H1-4,SYCP2,PRICKLE1,DHX36,KMT5A,ADAM20	12/-
19_Member	Reactome Gene Sets	R-HSA-3108232	SUMO E3 ligases SUMOylate target proteins	-2.53338	0	8364,8924,9126,10499,79677	H4C3,HERC2,SMC3,NCOA2,SMC6	5/142
19_Member	Reactome Gene Sets	R-HSA-2990846	SUMOylation	-2.45641	0	8364,8924,9126,10499,79677	H4C3,HERC2,SMC3,NCOA2,SMC6	5/148
19_Member	GO Biological Processes	GO:0051276	chromosome organization	-2.0646	0	3006,3008,8364,9126,10388,79677,144165,170506,387893	H1-2,H1-4,H4C3,SMC3,SYCP2,SMC6,PRICKLE1,DHX36,KMT5A	9/511
19_Member	Reactome Gene Sets	R-HSA-3108214	SUMOylation of DNA damage response and repair proteins	-2.02084	0	8924,9126,79677	HERC2,SMC3,SMC6	3/64
19_Member	Reactome Gene Sets	R-HSA-1221632	Meiotic synapsis	-1.89855	0	8364,9126,10388	H4C3,SMC3,SYCP2	3/71
19_Member	Reactome Gene Sets	R-HSA-1474165	Reproduction	-1.77761	0	8364,8748,9126,10388	H4C3,ADAM20,SMC3,SYCP2	4/143
19_Member	Reactome Gene Sets	R-HSA-1500620	Meiosis	-1.41434	0	8364,9126,10388	H4C3,SMC3,SYCP2	3/109
20_Summary	GO Biological Processes	GO:0030261	chromosome condensation	-2.53327	0	3006,3008,387893,8364,29072,6884	H1-2,H1-4,KMT5A,H4C3,SETD2,TAF13	6/-
20_Member	GO Biological Processes	GO:0030261	chromosome condensation	-2.53327	0	3006,3008,387893	H1-2,H1-4,KMT5A	3/42
20_Member	GO Biological Processes	GO:0045910	negative regulation of DNA recombination	-2.2704	0	3006,3008,387893	H1-2,H1-4,KMT5A	3/52
20_Member	GO Biological Processes	GO:0034728	nucleosome organization	-1.80807	0	3006,3008,8364,29072	H1-2,H1-4,H4C3,SETD2	4/140
20_Member	GO Biological Processes	GO:0000018	regulation of DNA recombination	-1.78768	0	3006,3008,29072,387893	H1-2,H1-4,SETD2,KMT5A	4/142
20_Member	GO Biological Processes	GO:0071824	protein-DNA complex organization	-1.54435	0	3006,3008,6884,8364,29072	H1-2,H1-4,TAF13,H4C3,SETD2	5/250
20_Member	GO Biological Processes	GO:0006334	nucleosome assembly	-1.31115	0	3006,3008,8364	H1-2,H1-4,H4C3	3/120
