# Supplementary material for: Targeting p75NTR activity alleviates the neurotoxic effect of high glucose on iPSC-derived dopaminergic neurons
Source: Research Square preprint supplement (doi:10.21203/rs.3.rs-7184834/v1), 2025-09-23
Supplement: Supplementary file 3 [file ae56ebf129cd8118c6682acd.xlsx]

## Sheet: GO Biological Processes
GO Biological Processes - Terms deriving from up-regulated genes
Gene_ontology	Corresponding_genes	Positive_log2fc_genes	Negative_log2fc_genes
cell cycle phase transition	NEUROG1, CCNB1, CCNB2, BIRC5, PLK1, UBE2C, TACC3	NEUROG1 (2.615), CCNB1 (1.993), CCNB2 (1.92), BIRC5 (1.612), PLK1 (1.517), UBE2C (1.501), TACC3 (1.303)
response to tumor necrosis factor	COL1A1, CCL2, CD58	COL1A1 (2.434), CCL2 (2.431), CD58 (2.125)
DNA repair	CDC45, PIF1, CDCA5, PLK1, PTTG1	CDC45 (2.508), PIF1 (2.372), CDCA5 (1.771), PLK1 (1.517), PTTG1 (1.262)
double-strand break repair	CDC45, CDCA5, PLK1	CDC45 (2.508), CDCA5 (1.771), PLK1 (1.517)
negative regulation of secretion	NEUROG1, GJA1, CYP51A1	NEUROG1 (2.615), GJA1 (1.597), CYP51A1 (1.372)
GO Biological Processes - Terms deriving from down-regulated genes
Gene_ontology	Corresponding_genes	Positive_log2fc_genes	Negative_log2fc_genes
postsynaptic actin cytoskeleton organization	NOS1AP, POTEE, POTEF, POTEI		POTEI (-4.918), POTEF (-3.96), POTEE (-3.117), NOS1AP (-1.488)
amino acid metabolic process	ASNS, SHMT2, WARS, YARS, LARS, SARS, PYCR1, PHGDH, CARS, ASS1		ASS1 (-3.549), CARS (-2.234), PHGDH (-1.925), PYCR1 (-1.914), SARS (-1.666), LARS (-1.602), YARS (-1.556), WARS (-1.546), SHMT2 (-1.517), ASNS (-1.449)
regulation of interferon-alpha production	SETD2, DHX36, TLR9		TLR9 (-4.943), DHX36 (-1.886), SETD2 (-1.43)
response to starvation	ASNS, YARS, LARS, SLC7A5, JMY, SMDT1, PCK2		PCK2 (-2.707), SMDT1 (-2.471), JMY (-1.867), SLC7A5 (-1.792), LARS (-1.602), YARS (-1.556), ASNS (-1.449)
protein localization to organelle	PRICKLE1, TIMM44, CEP350, CACNG2, KPNA5, SYNE1, RN7SL1, GCC2, PEX5L, FILIP1L, RN7SL2, BICD1, FSIP2, HIST1H4C		HIST1H4C (-4.046), FSIP2 (-2.778), BICD1 (-2.633), RN7SL2 (-2.553), FILIP1L (-2.325), PEX5L (-2.278), GCC2 (-2.009), RN7SL1 (-1.99), SYNE1 (-1.983), KPNA5 (-1.83), CACNG2 (-1.821), CEP350 (-1.58), TIMM44 (-1.498), PRICKLE1 (-1.38)

## Sheet: Reactome Gene Sets
Reactome Gene Sets - Terms deriving from up-regulated genes
Gene_ontology	Corresponding_genes	Positive_log2fc_genes	Negative_log2fc_genes
Cholesterol biosynthesis	ACAT2, MVK, FDFT1, CYP51A1, FDPS	ACAT2 (1.791), MVK (1.456), FDFT1 (1.436), CYP51A1 (1.372), FDPS (1.322)
Signaling by Rho GTPases	DEPDC1B, KIF2C, GJA1, ARHGAP31, PLK1	DEPDC1B (1.932), KIF2C (1.822), GJA1 (1.597), ARHGAP31 (1.55), PLK1 (1.517)
Cellular responses to stress	RPS17, HSPA2, CCL2, IGFBP7, E2F2, CALR, UBE2C	RPS17 (4.233), HSPA2 (2.521), CCL2 (2.431), IGFBP7 (2.362), E2F2 (1.671), CALR (1.536), UBE2C (1.501)
Cellular Senescence	IGFBP7, E2F2, UBE2C	IGFBP7 (2.362), E2F2 (1.671), UBE2C (1.501)
Reactome Gene Sets - Terms deriving from down-regulated genes
Gene_ontology	Corresponding_genes	Positive_log2fc_genes	Negative_log2fc_genes
Cytosolic tRNA aminoacylation	WARS, YARS, LARS, SARS, CARS		CARS (-2.234), SARS (-1.666), LARS (-1.602), YARS (-1.556), WARS (-1.546)
PKMTs methylate histone lysines	SETD2, NSD1, ASH1L, SETD8, HIST1H4C		HIST1H4C (-4.046), SETD8 (-2.44), ASH1L (-2.112), NSD1 (-1.496), SETD2 (-1.43)

## Sheet: Pathways
Pathways - Terms deriving from up-regulated genes
Gene_ontology	Corresponding_genes	Positive_log2fc_genes	Negative_log2fc_genes
FOXM1 PATHWAY	CENPA, CCNB1, CCNB2, BIRC5, PLK1	CENPA (2.304), CCNB1 (1.993), CCNB2 (1.92), BIRC5 (1.612), PLK1 (1.517)
PLK1 PATHWAY	KIF20A, CCNB1, PLK1, TPX2	KIF20A (2.223), CCNB1 (1.993), PLK1 (1.517), TPX2 (1.421)
P73PATHWAY	CCNB1, TP53I3, PLK1	CCNB1 (1.993), TP53I3 (1.826), PLK1 (1.517)
FoxO signaling pathway	CCNB1, CCNB2, PLK1	CCNB1 (1.993), CCNB2 (1.92), PLK1 (1.517)
p53 signaling pathway	CCNB1, CCNB2, RRM2, TP53I3	CCNB1 (1.993), CCNB2 (1.92), RRM2 (1.829), TP53I3 (1.826)
Pathways - Terms deriving from down-regulated genes
Gene_ontology	Corresponding_genes	Positive_log2fc_genes	Negative_log2fc_genes
ERA GENOMIC PATHWAY	NCOA7, C10orf12, NCOA2, ESR2		ESR2 (-4.085), NCOA2 (-3.165), C10orf12 (-2.958), NCOA7 (-1.875)

## Sheet: Totals (unformatted)
Gene_ontology	Corresponding_genes	Positive_log2fc_genes	Negative_log2fc_genes
cell cycle phase transition	NEUROG1, CCNB1, CCNB2, BIRC5, PLK1, UBE2C, TACC3	NEUROG1 (2.615), CCNB1 (1.993), CCNB2 (1.92), BIRC5 (1.612), PLK1 (1.517), UBE2C (1.501), TACC3 (1.303)
response to tumor necrosis factor	COL1A1, CCL2, CD58	COL1A1 (2.434), CCL2 (2.431), CD58 (2.125)
DNA repair	CDC45, PIF1, CDCA5, PLK1, PTTG1	CDC45 (2.508), PIF1 (2.372), CDCA5 (1.771), PLK1 (1.517), PTTG1 (1.262)
double-strand break repair	CDC45, CDCA5, PLK1	CDC45 (2.508), CDCA5 (1.771), PLK1 (1.517)
negative regulation of secretion	NEUROG1, GJA1, CYP51A1	NEUROG1 (2.615), GJA1 (1.597), CYP51A1 (1.372)
postsynaptic actin cytoskeleton organization	NOS1AP, POTEE, POTEF, POTEI		POTEI (-4.918), POTEF (-3.96), POTEE (-3.117), NOS1AP (-1.488)
amino acid metabolic process	ASNS, SHMT2, WARS, YARS, LARS, SARS, PYCR1, PHGDH, CARS, ASS1		ASS1 (-3.549), CARS (-2.234), PHGDH (-1.925), PYCR1 (-1.914), SARS (-1.666), LARS (-1.602), YARS (-1.556), WARS (-1.546), SHMT2 (-1.517), ASNS (-1.449)
regulation of interferon-alpha production	SETD2, DHX36, TLR9		TLR9 (-4.943), DHX36 (-1.886), SETD2 (-1.43)
response to starvation	ASNS, YARS, LARS, SLC7A5, JMY, SMDT1, PCK2		PCK2 (-2.707), SMDT1 (-2.471), JMY (-1.867), SLC7A5 (-1.792), LARS (-1.602), YARS (-1.556), ASNS (-1.449)
protein localization to organelle	PRICKLE1, TIMM44, CEP350, CACNG2, KPNA5, SYNE1, RN7SL1, GCC2, PEX5L, FILIP1L, RN7SL2, BICD1, FSIP2, HIST1H4C		HIST1H4C (-4.046), FSIP2 (-2.778), BICD1 (-2.633), RN7SL2 (-2.553), FILIP1L (-2.325), PEX5L (-2.278), GCC2 (-2.009), RN7SL1 (-1.99), SYNE1 (-1.983), KPNA5 (-1.83), CACNG2 (-1.821), CEP350 (-1.58), TIMM44 (-1.498), PRICKLE1 (-1.38)
Cholesterol biosynthesis	ACAT2, MVK, FDFT1, CYP51A1, FDPS	ACAT2 (1.791), MVK (1.456), FDFT1 (1.436), CYP51A1 (1.372), FDPS (1.322)
Signaling by Rho GTPases	DEPDC1B, KIF2C, GJA1, ARHGAP31, PLK1	DEPDC1B (1.932), KIF2C (1.822), GJA1 (1.597), ARHGAP31 (1.55), PLK1 (1.517)
Cellular responses to stress	RPS17, HSPA2, CCL2, IGFBP7, E2F2, CALR, UBE2C	RPS17 (4.233), HSPA2 (2.521), CCL2 (2.431), IGFBP7 (2.362), E2F2 (1.671), CALR (1.536), UBE2C (1.501)
Cellular Senescence	IGFBP7, E2F2, UBE2C	IGFBP7 (2.362), E2F2 (1.671), UBE2C (1.501)
Cytosolic tRNA aminoacylation	WARS, YARS, LARS, SARS, CARS		CARS (-2.234), SARS (-1.666), LARS (-1.602), YARS (-1.556), WARS (-1.546)
PKMTs methylate histone lysines	SETD2, NSD1, ASH1L, SETD8, HIST1H4C		HIST1H4C (-4.046), SETD8 (-2.44), ASH1L (-2.112), NSD1 (-1.496), SETD2 (-1.43)
FOXM1 PATHWAY	CENPA, CCNB1, CCNB2, BIRC5, PLK1	CENPA (2.304), CCNB1 (1.993), CCNB2 (1.92), BIRC5 (1.612), PLK1 (1.517)
PLK1 PATHWAY	KIF20A, CCNB1, PLK1, TPX2	KIF20A (2.223), CCNB1 (1.993), PLK1 (1.517), TPX2 (1.421)
P73PATHWAY	CCNB1, TP53I3, PLK1	CCNB1 (1.993), TP53I3 (1.826), PLK1 (1.517)
FoxO signaling pathway	CCNB1, CCNB2, PLK1	CCNB1 (1.993), CCNB2 (1.92), PLK1 (1.517)
p53 signaling pathway	CCNB1, CCNB2, RRM2, TP53I3	CCNB1 (1.993), CCNB2 (1.92), RRM2 (1.829), TP53I3 (1.826)
ERA GENOMIC PATHWAY	NCOA7, C10orf12, NCOA2, ESR2		ESR2 (-4.085), NCOA2 (-3.165), C10orf12 (-2.958), NCOA7 (-1.875)
